# Supplementary material
Source: publisher figshare collection journal article supplement (https://acs.figshare.com/ndownloader/files/4038517)

## Enantioselective Hydroarylation of Bridged [3.2.1] Heterocycles: An Efficient Entry into the Homoepibatidine Skeleton

*Ryan A. Brawn, Cristiano R. W. Guimarães, Kim F. McClure, Spiros Liras*

### **<sup>1</sup>H and <sup>13</sup>C NMR Data.**

The hydroarylation products give a mix of rotational isomers in <sup>1</sup>H and <sup>13</sup>C NMR as well as in HPLC. Once the carbamate is deprotected a single isomer is observed. Running the NMR at elevated temperatures also causes the peaks to coalesce, as shown in the spectra for **2b** in DMSO at 85 °C (SI-86 to SI-89).

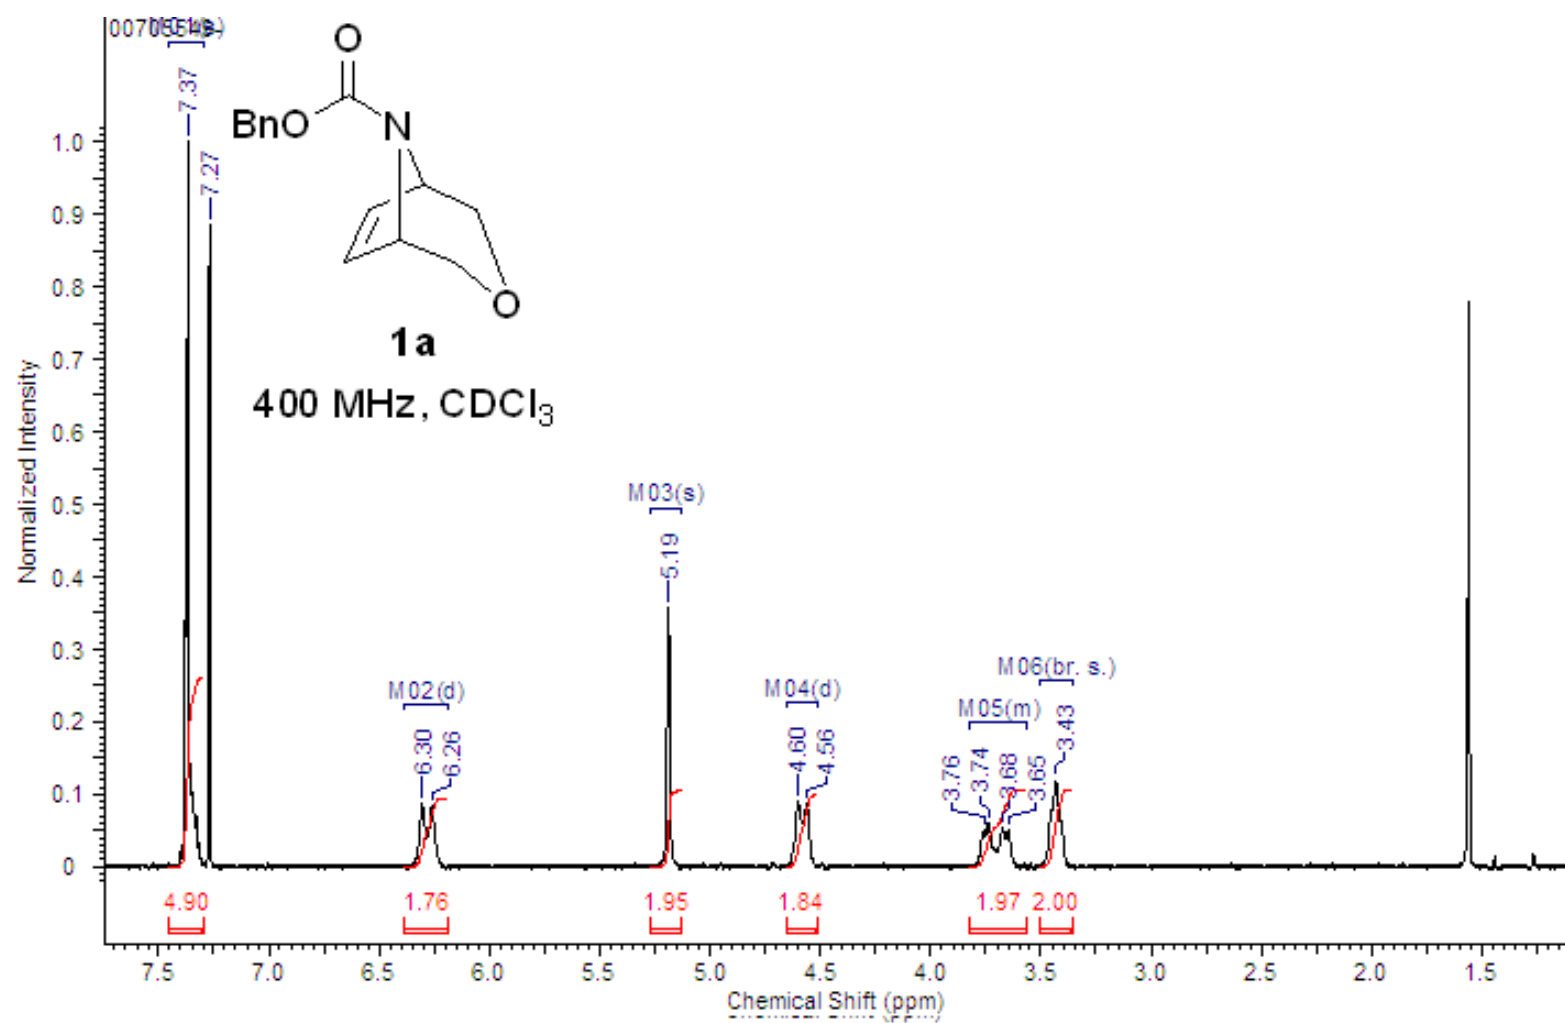

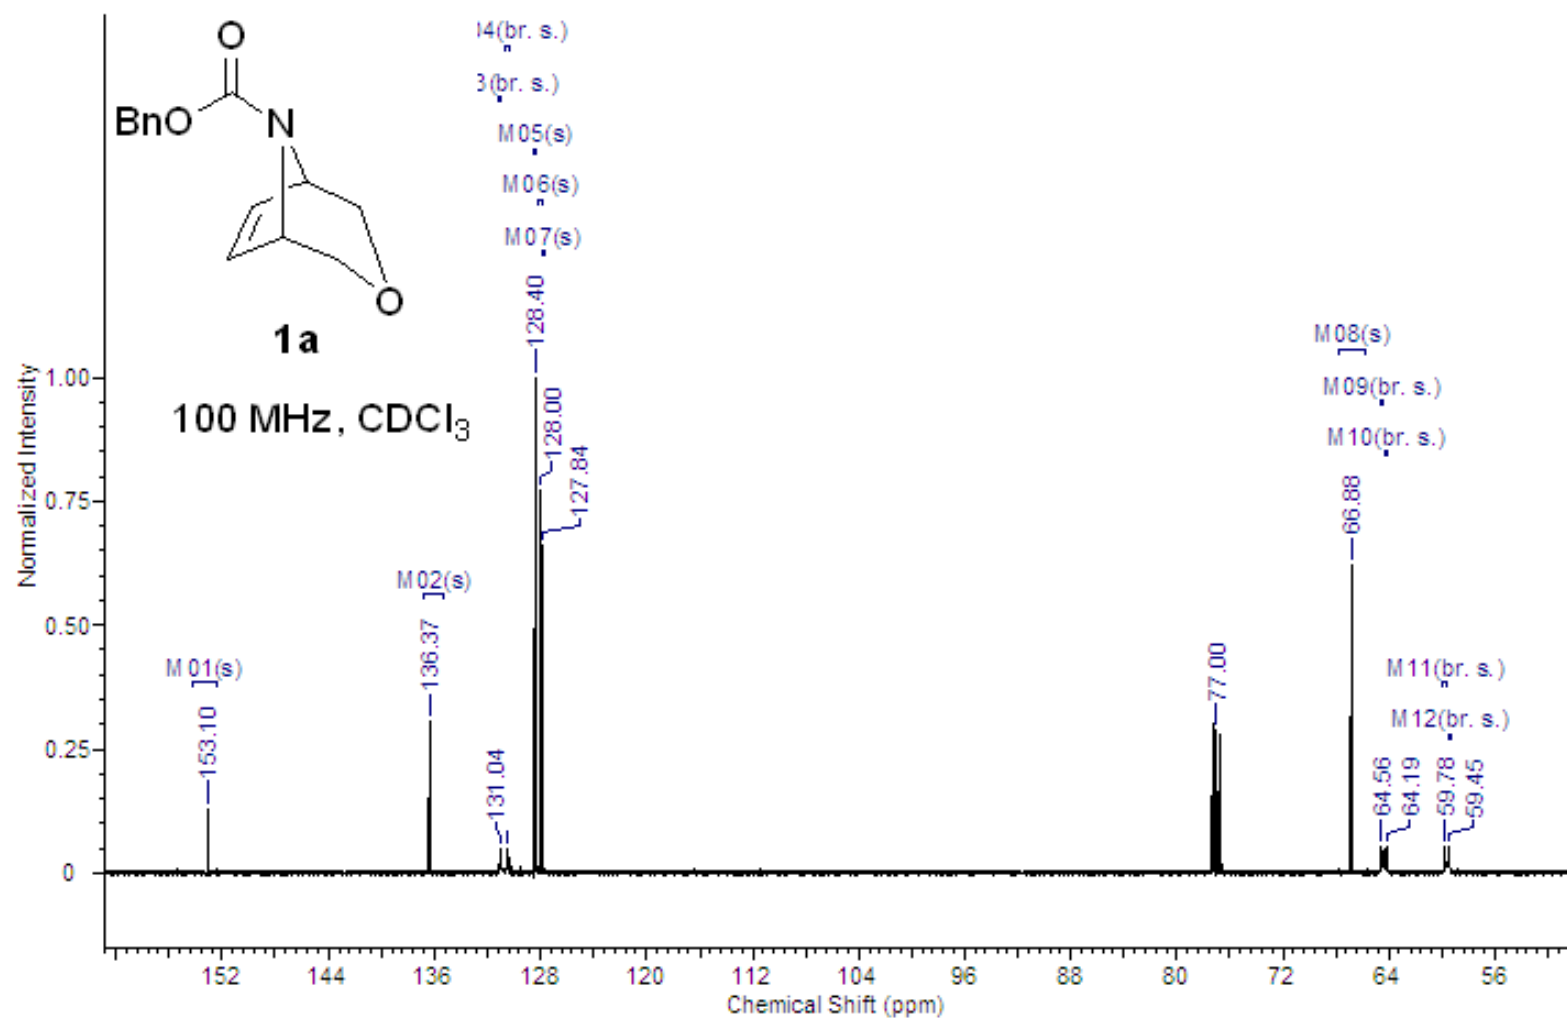

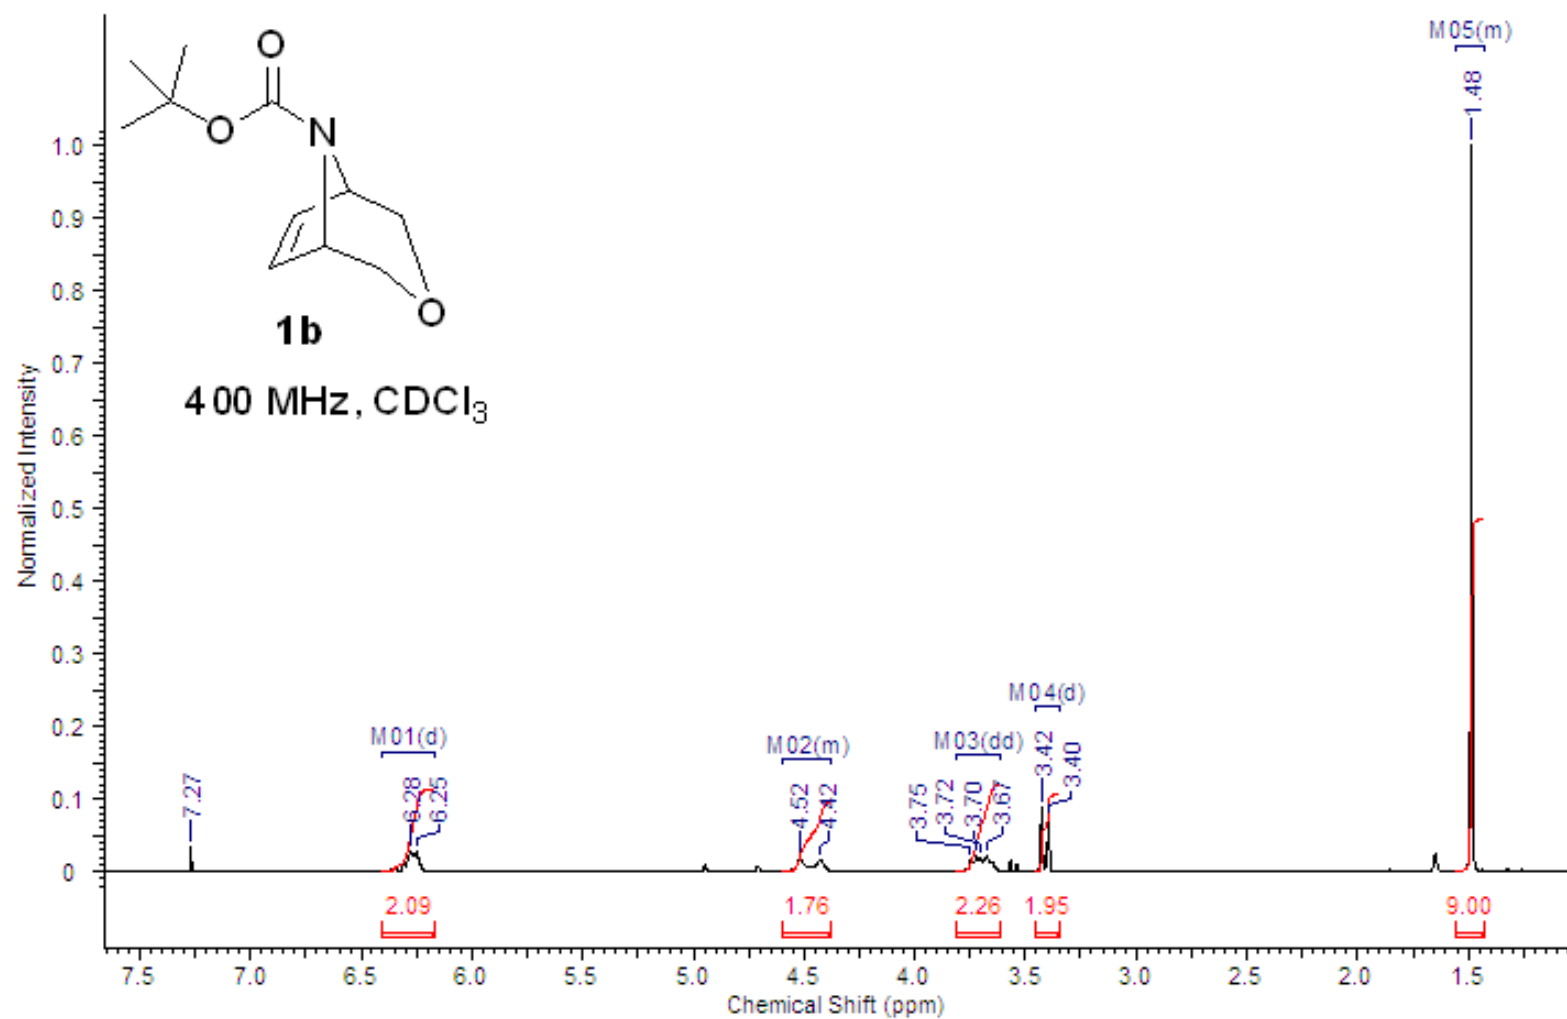

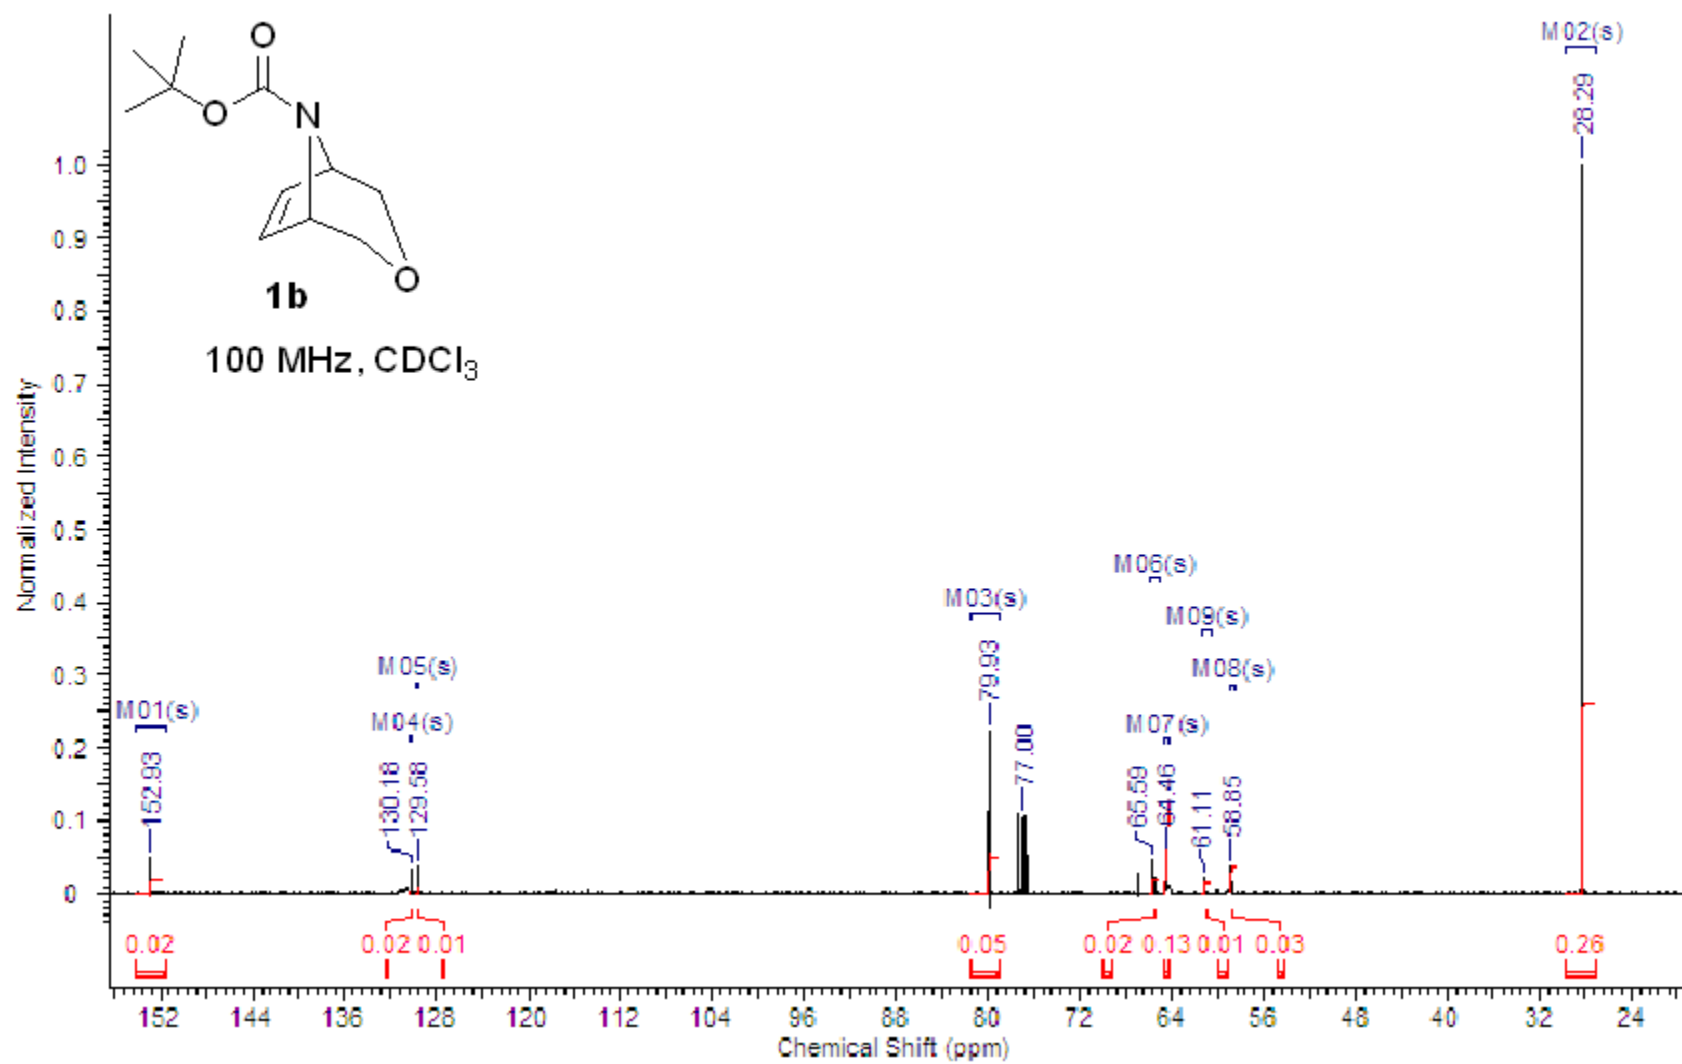

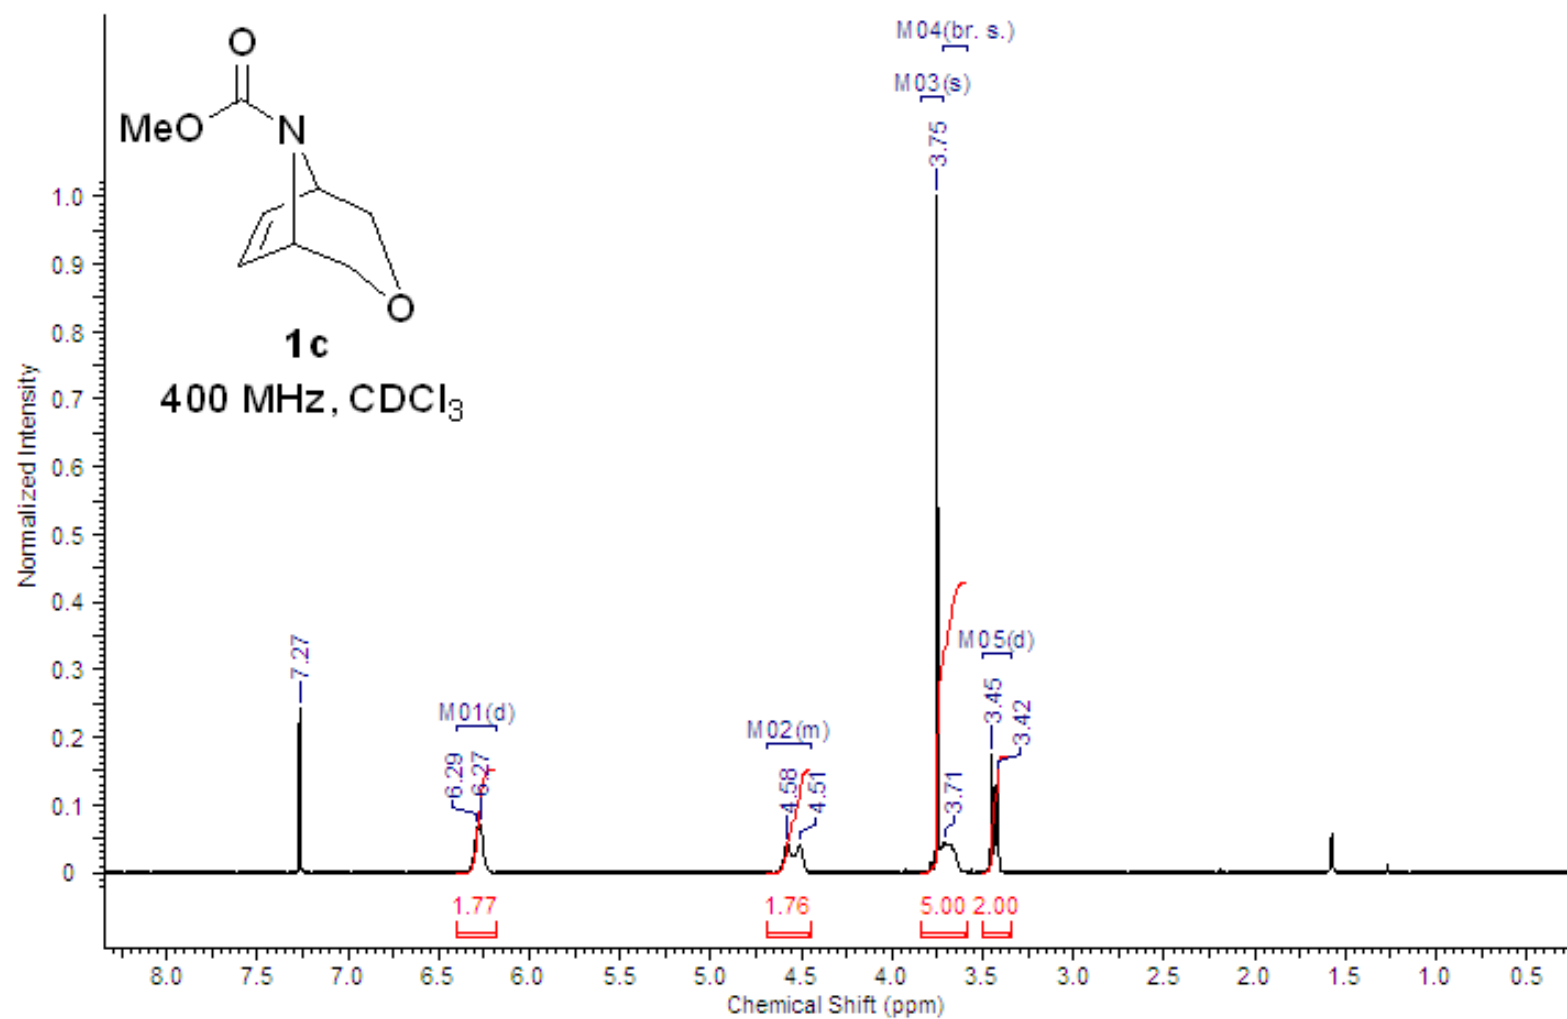

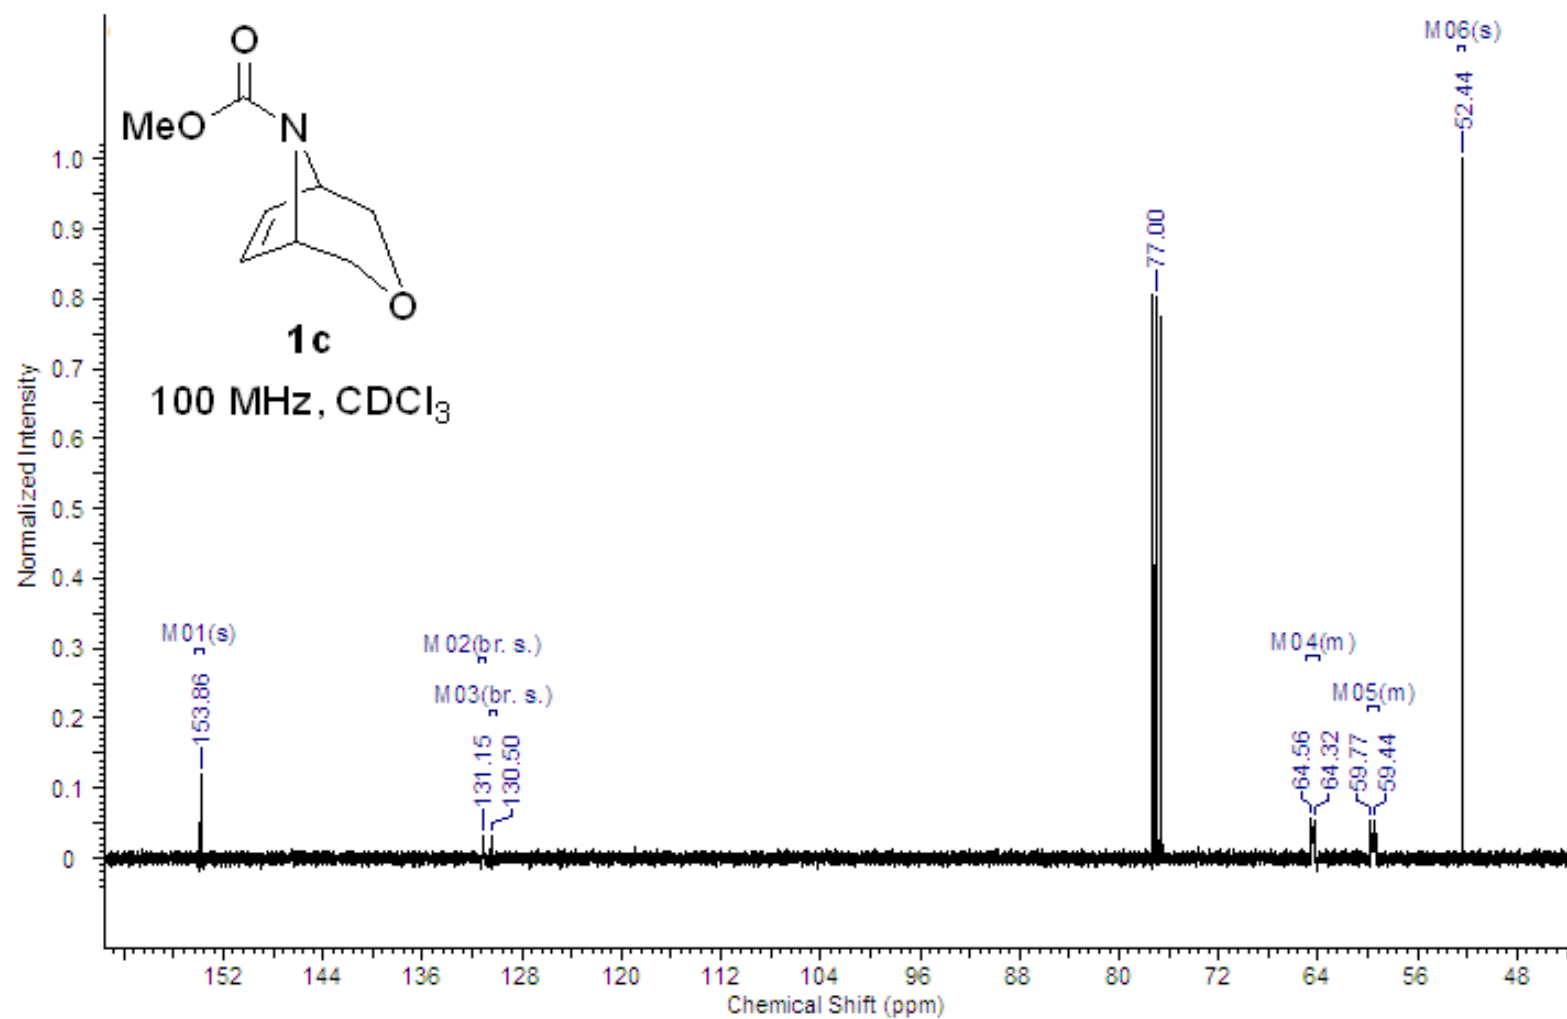

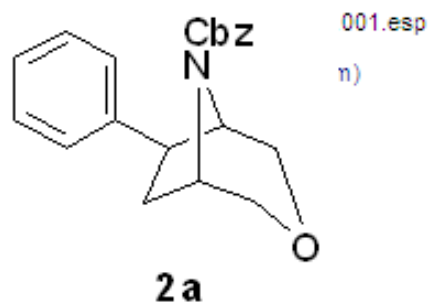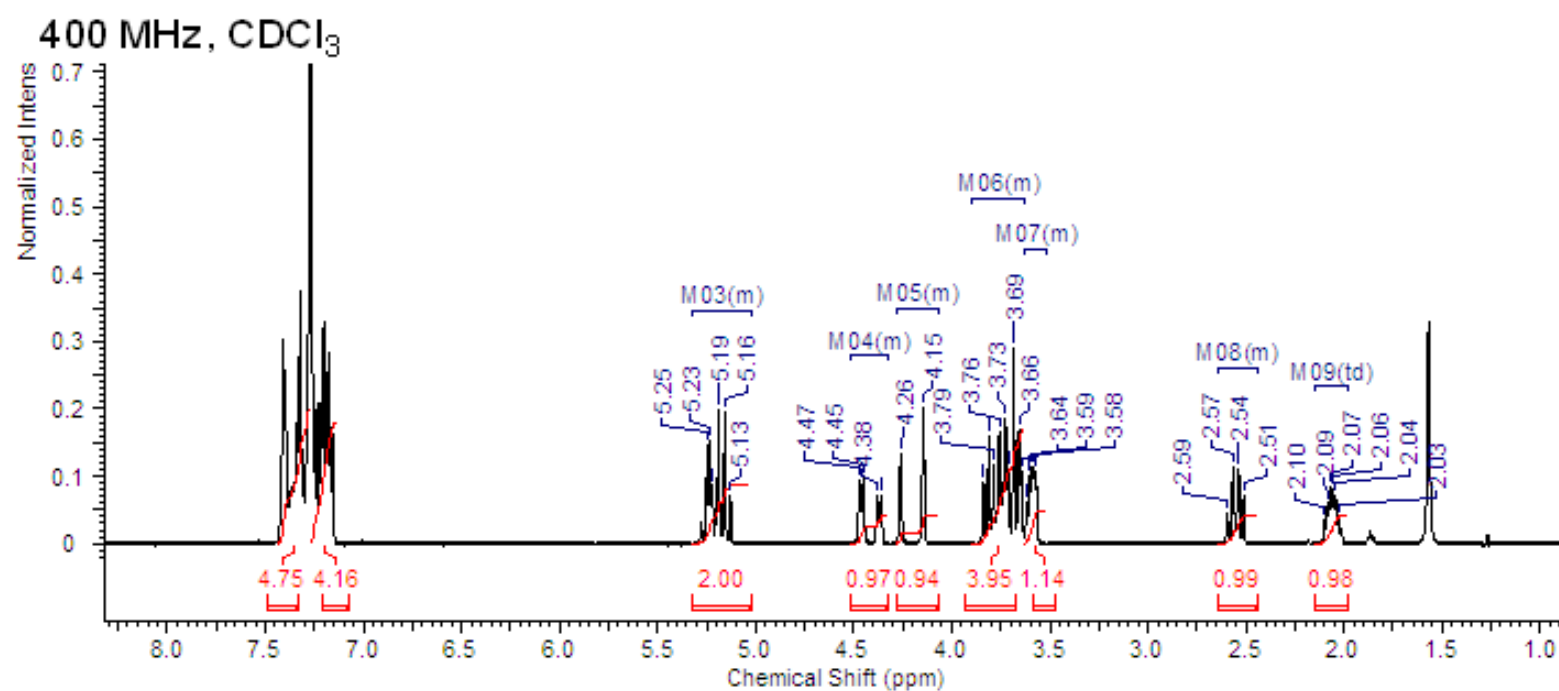

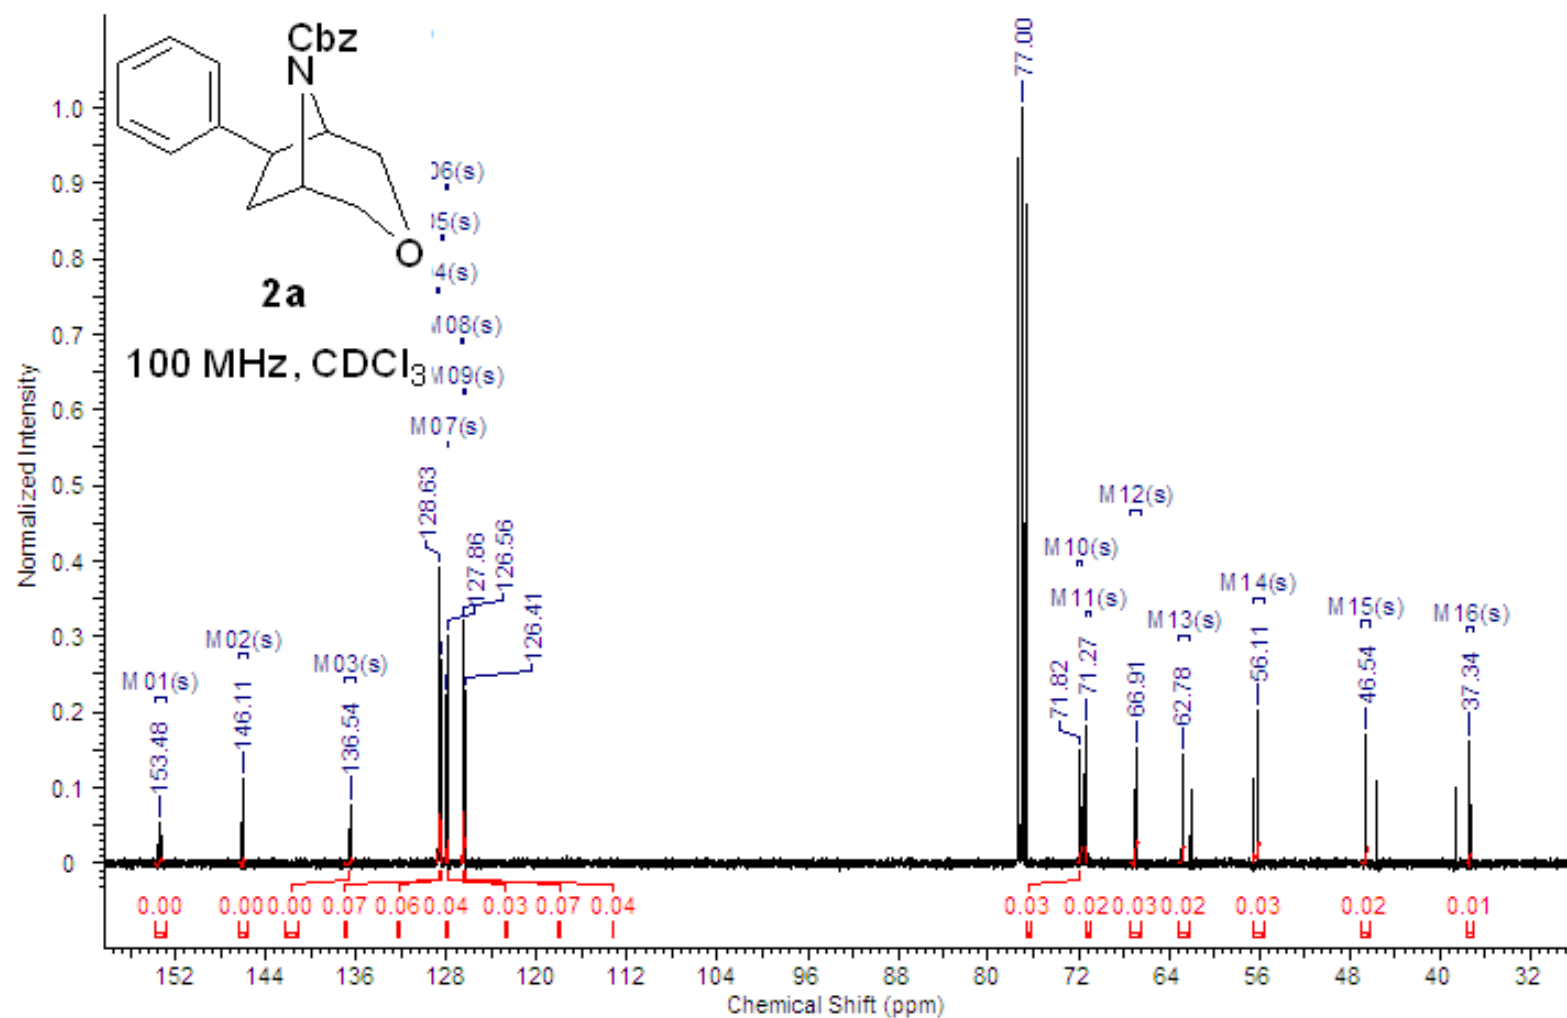

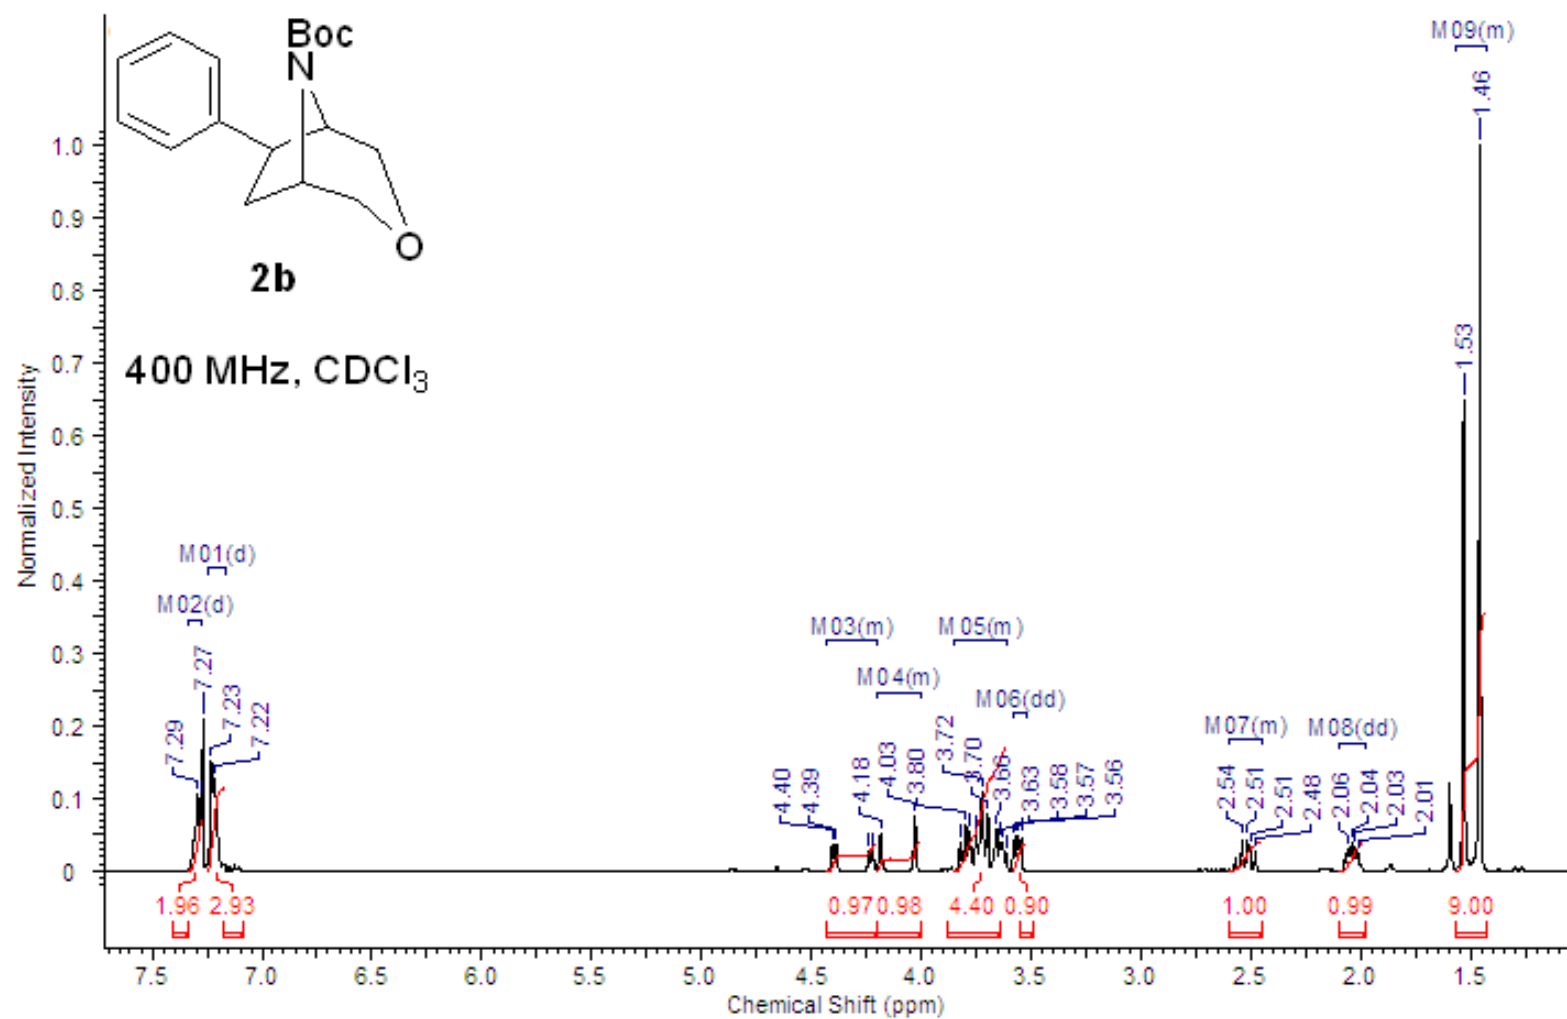

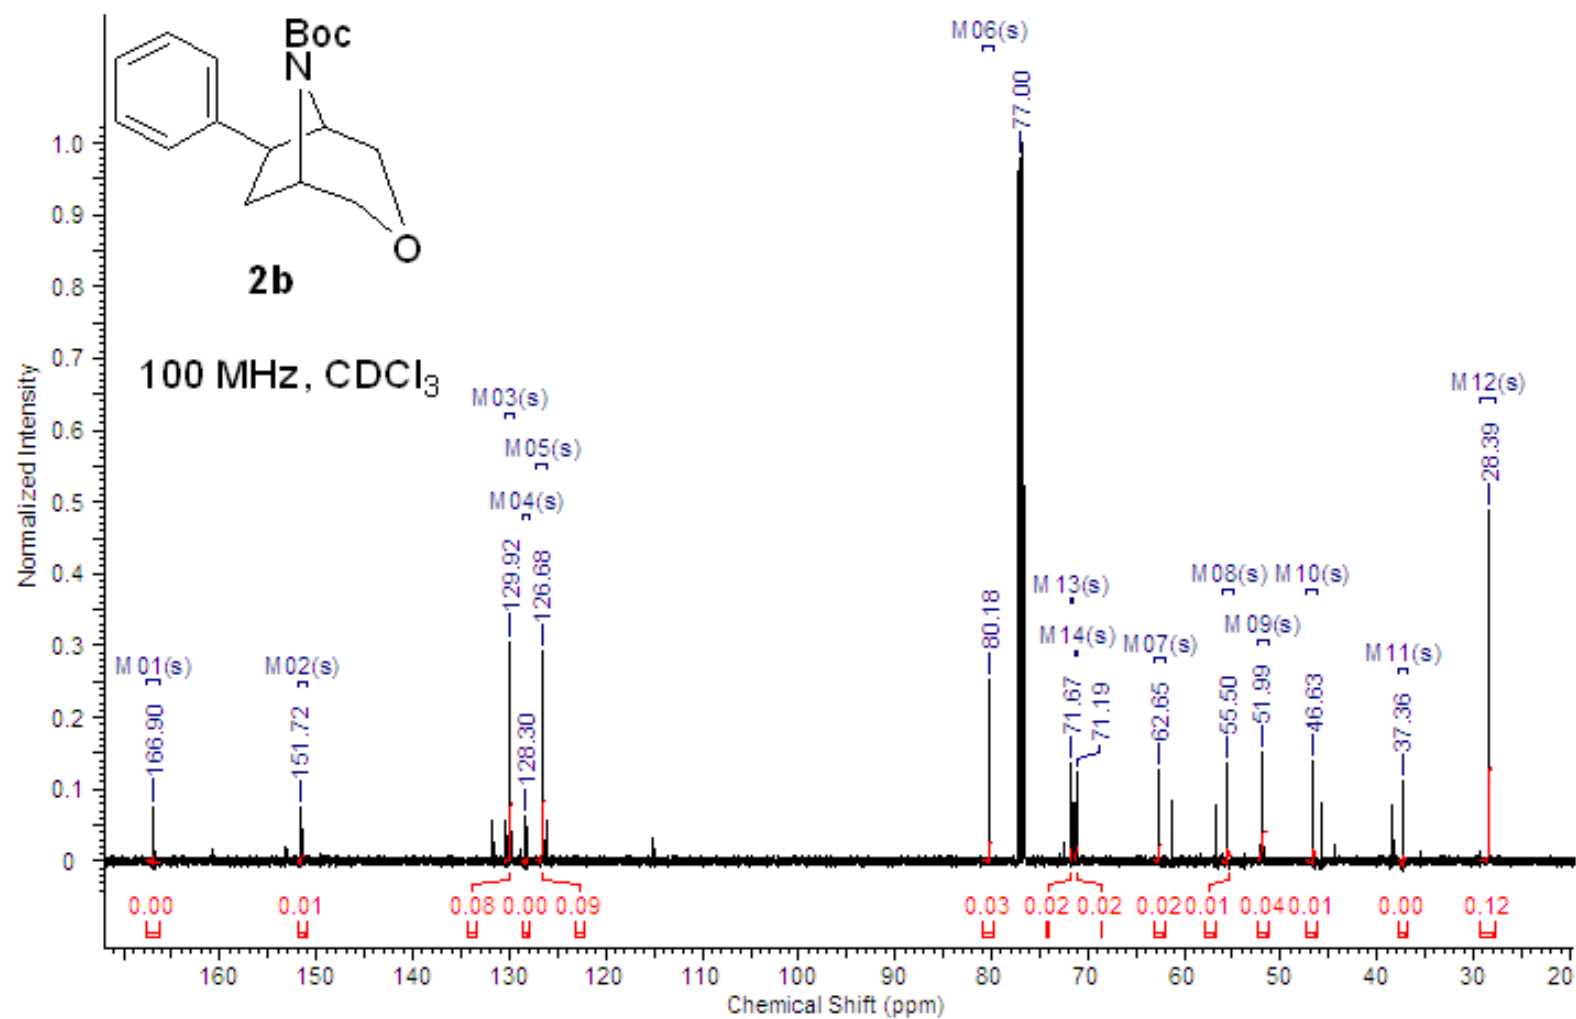

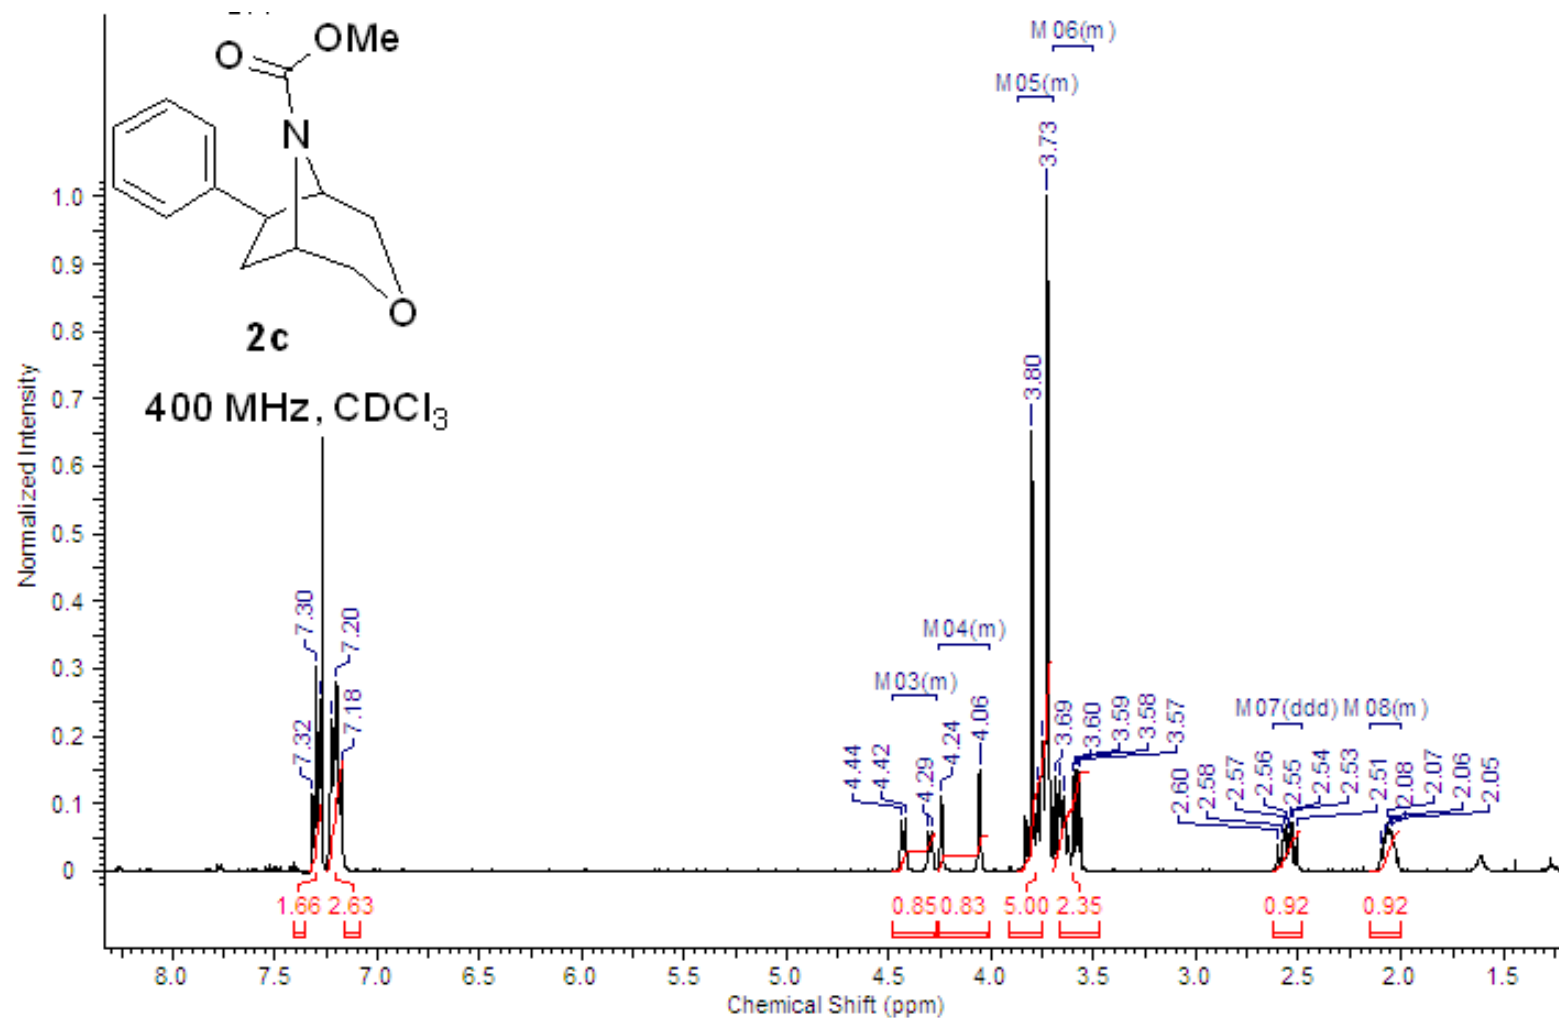

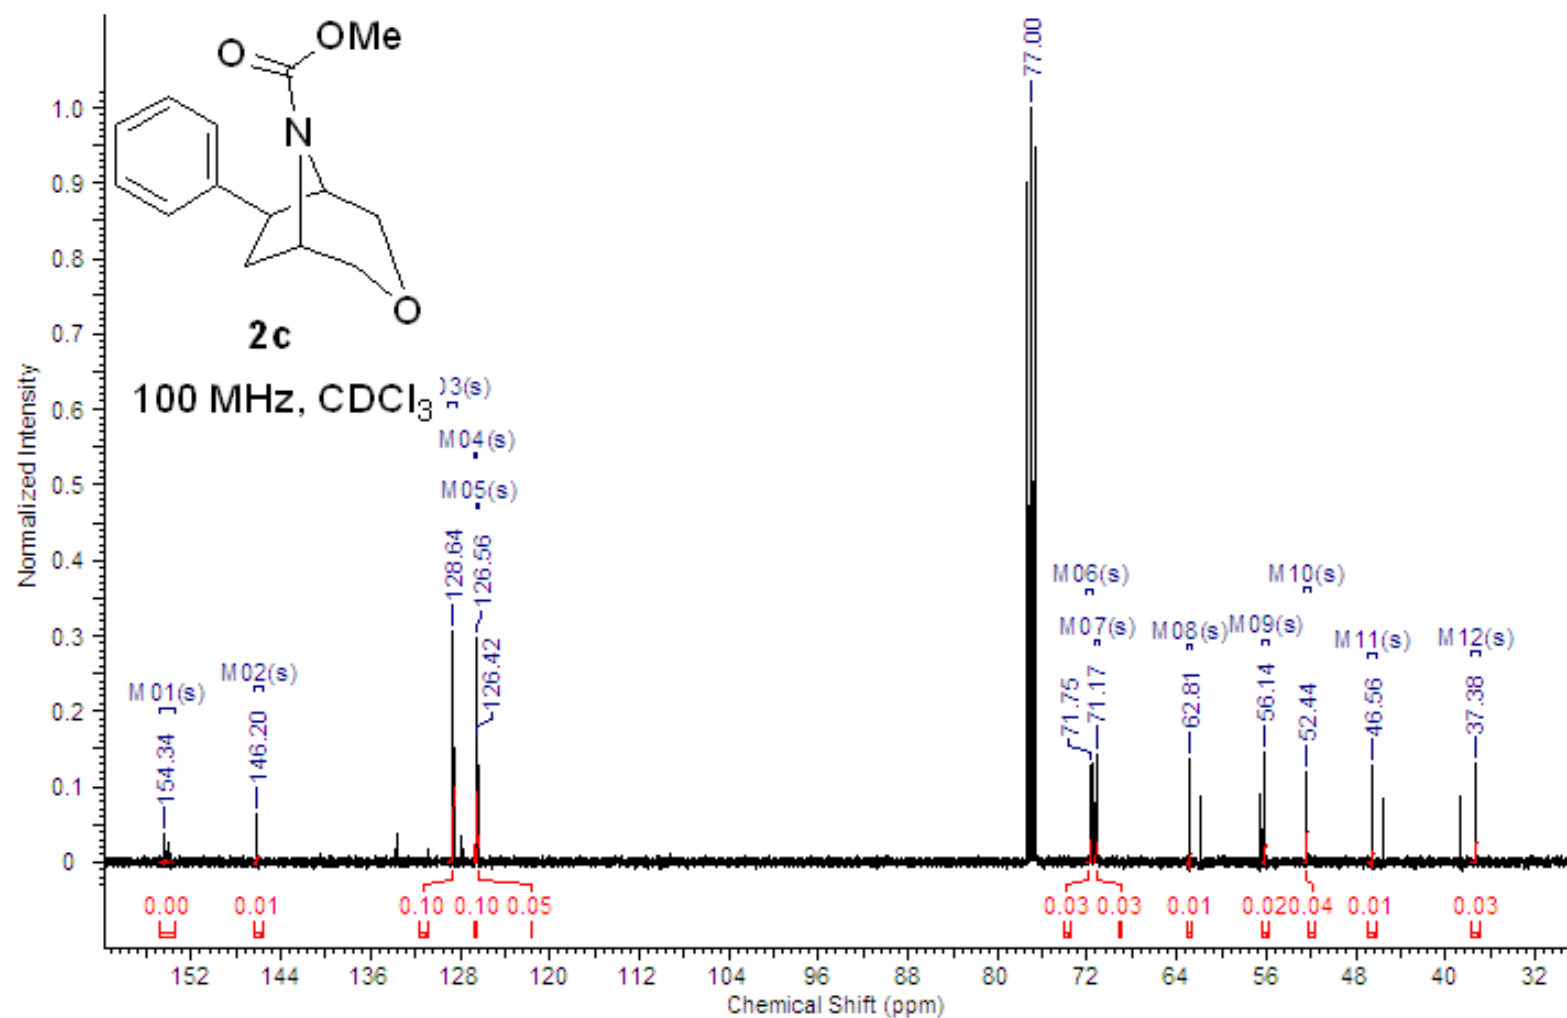

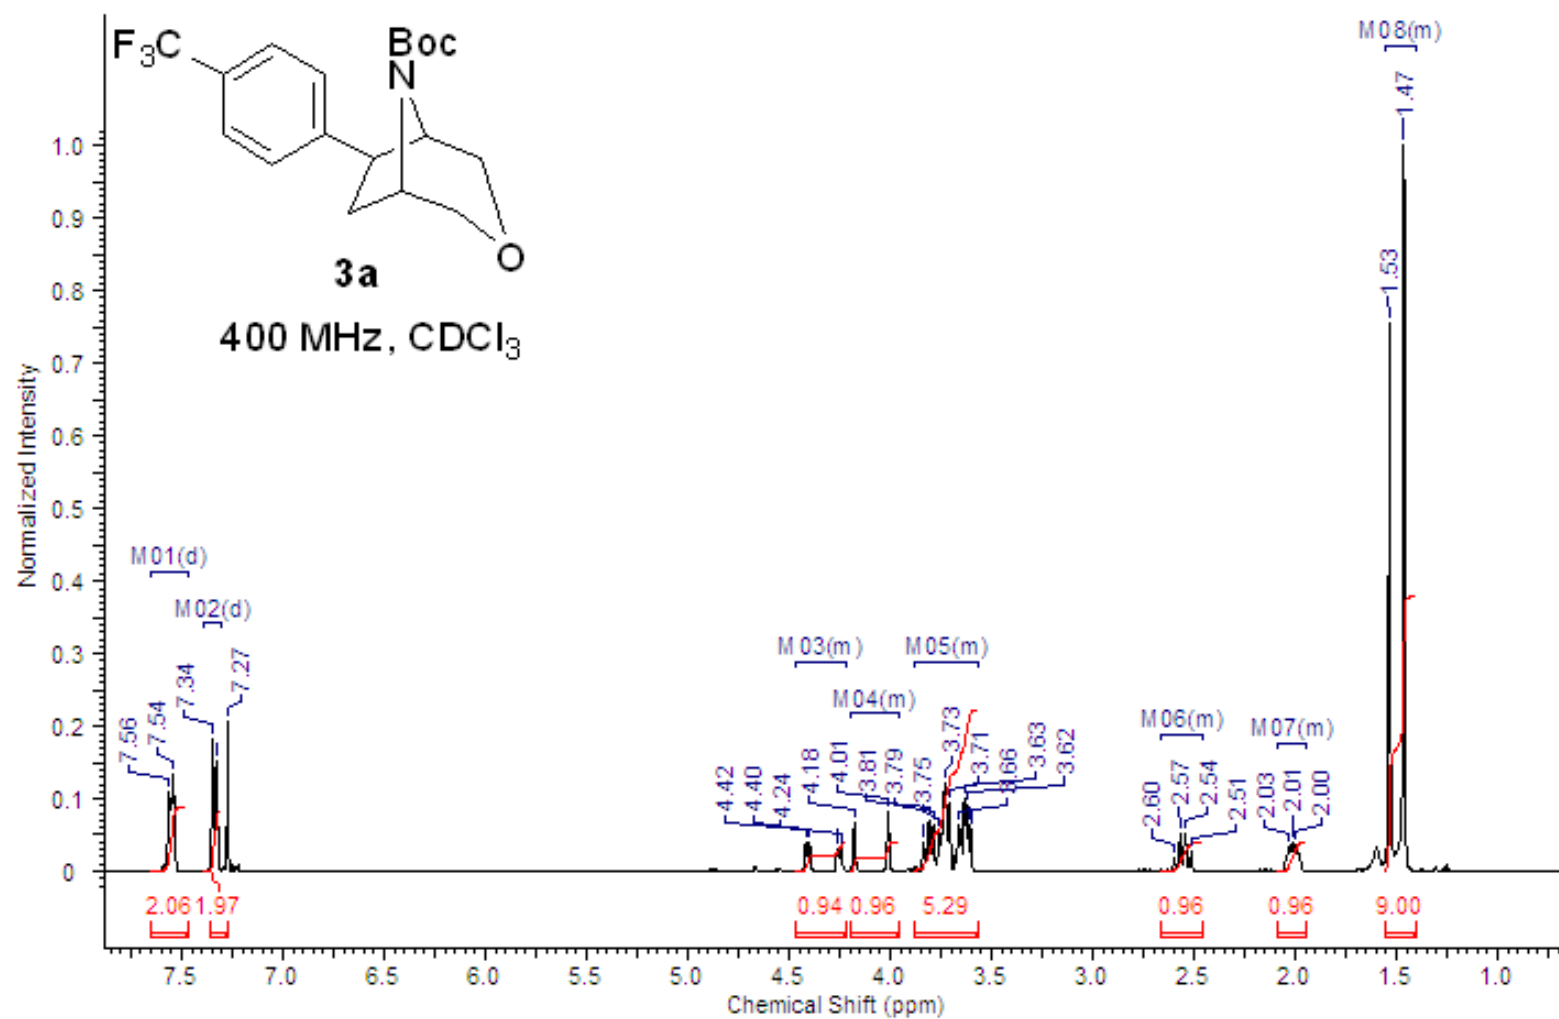

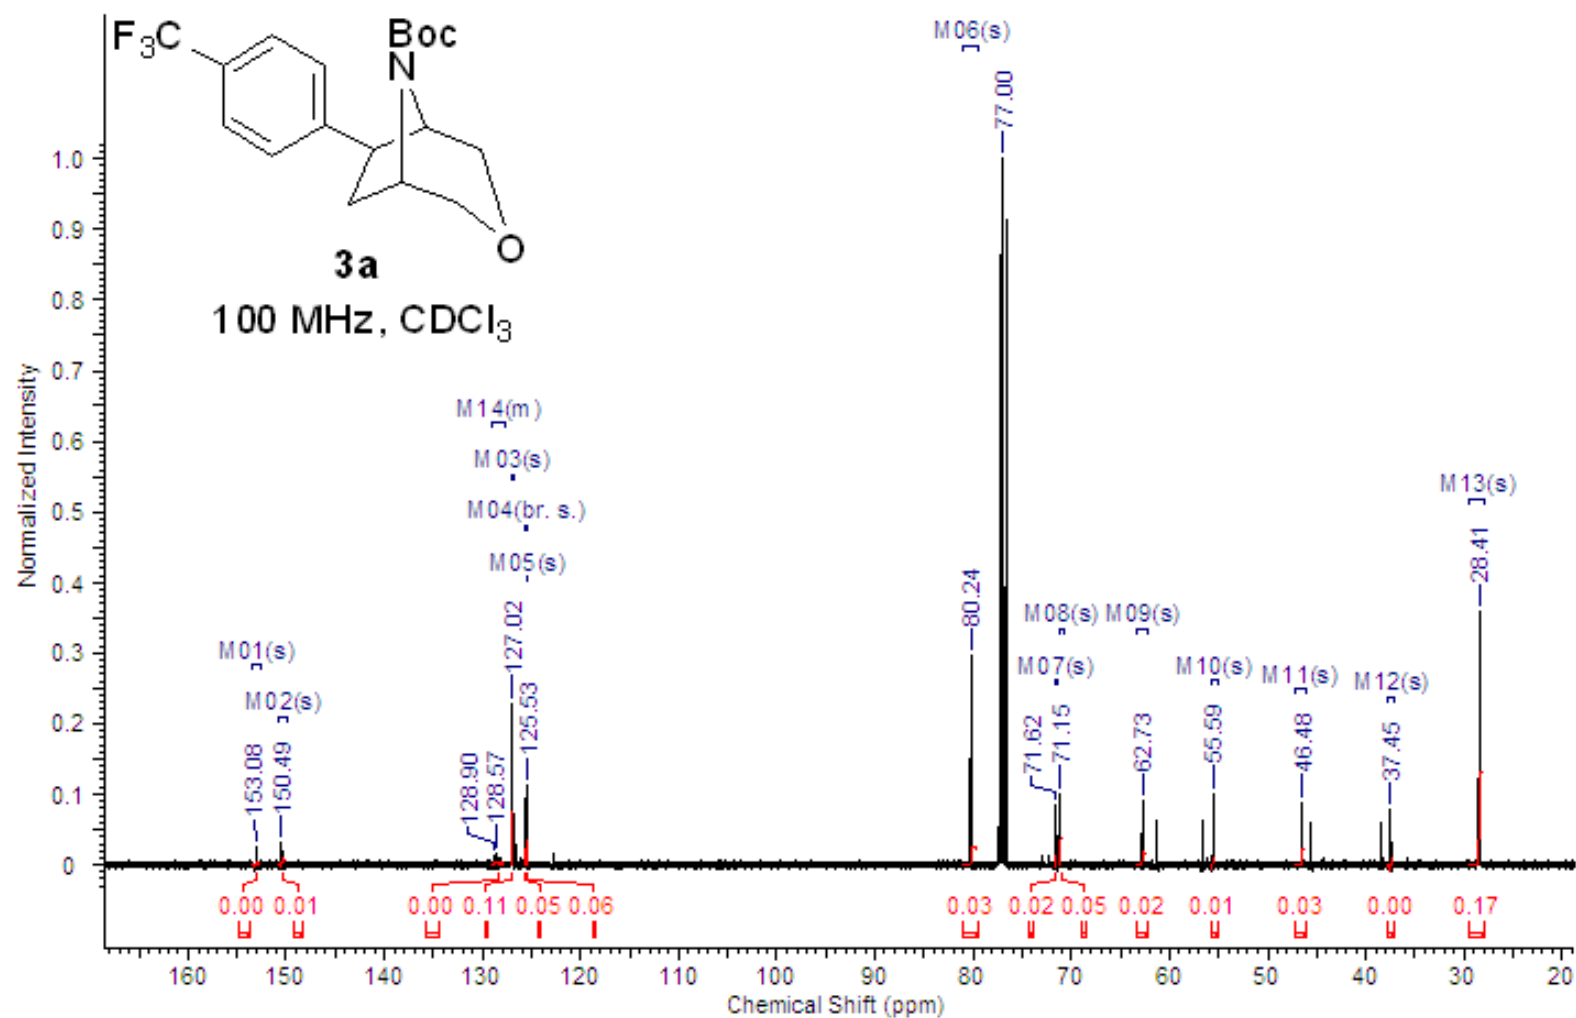

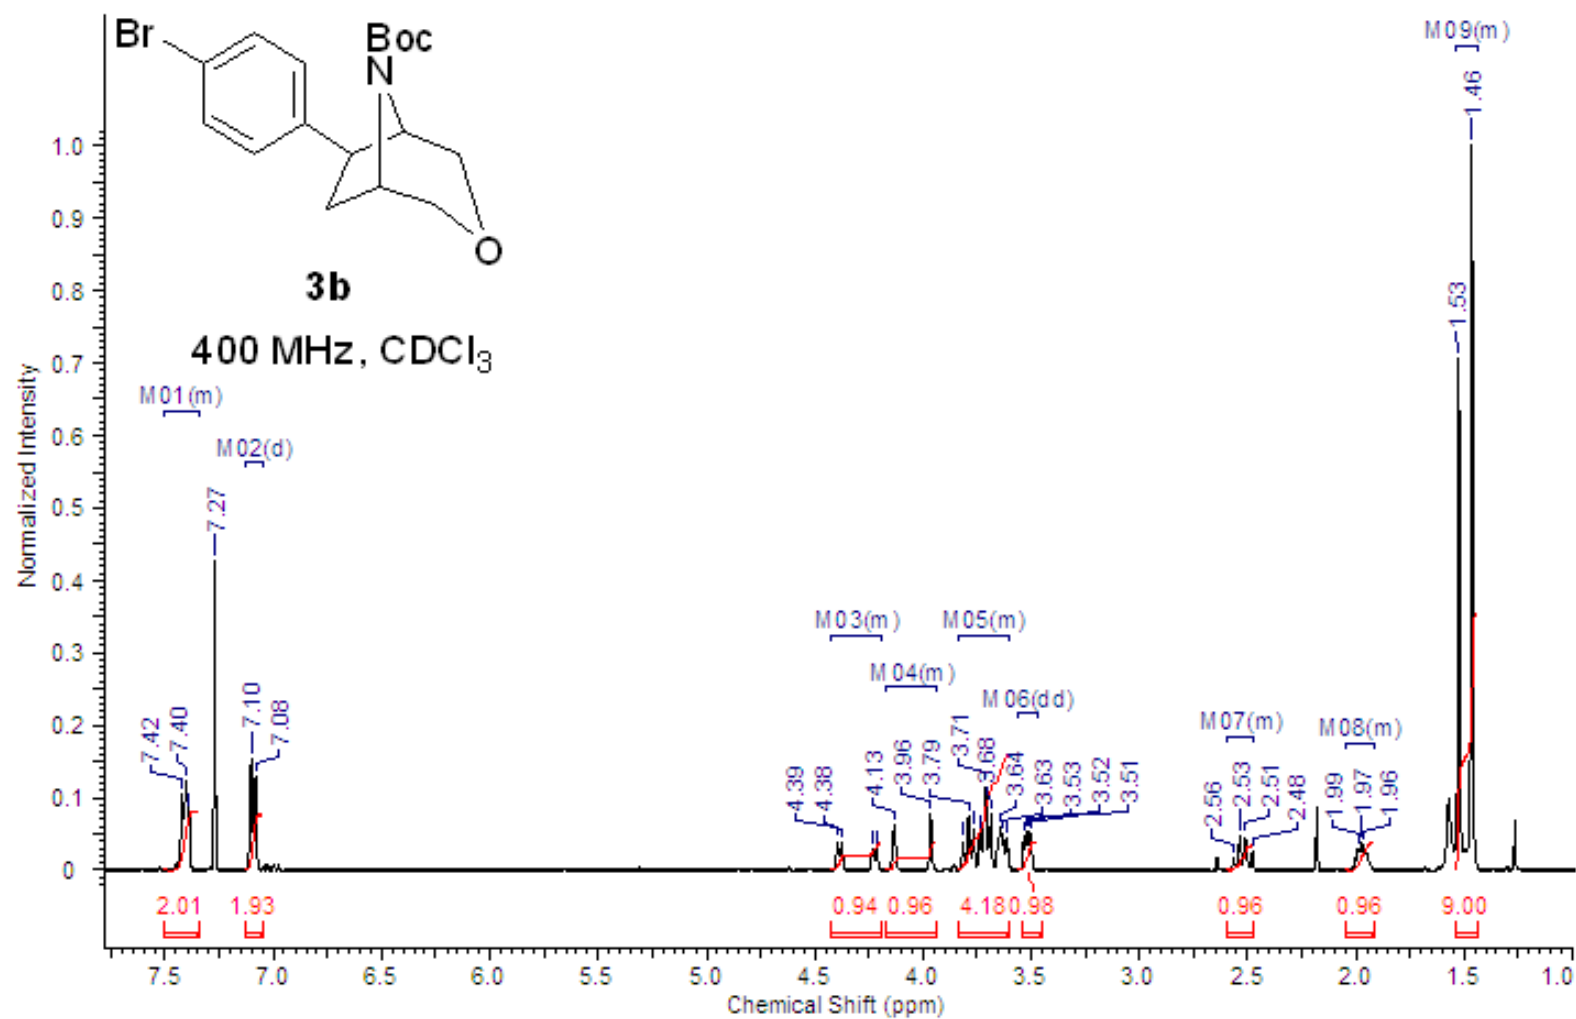

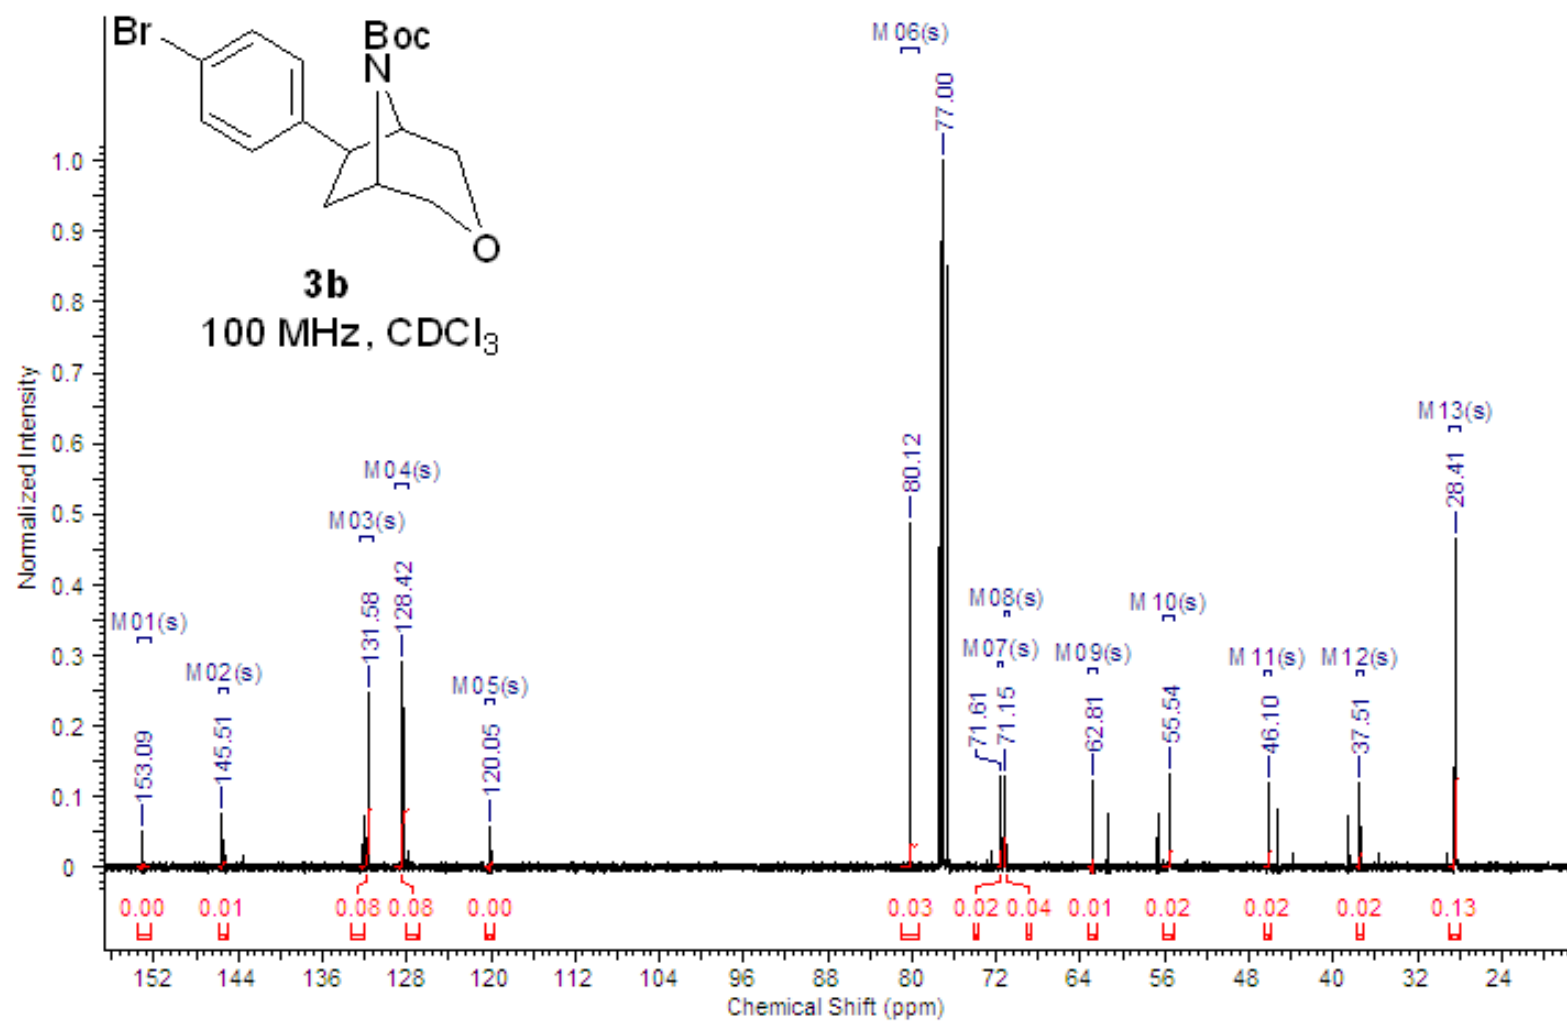

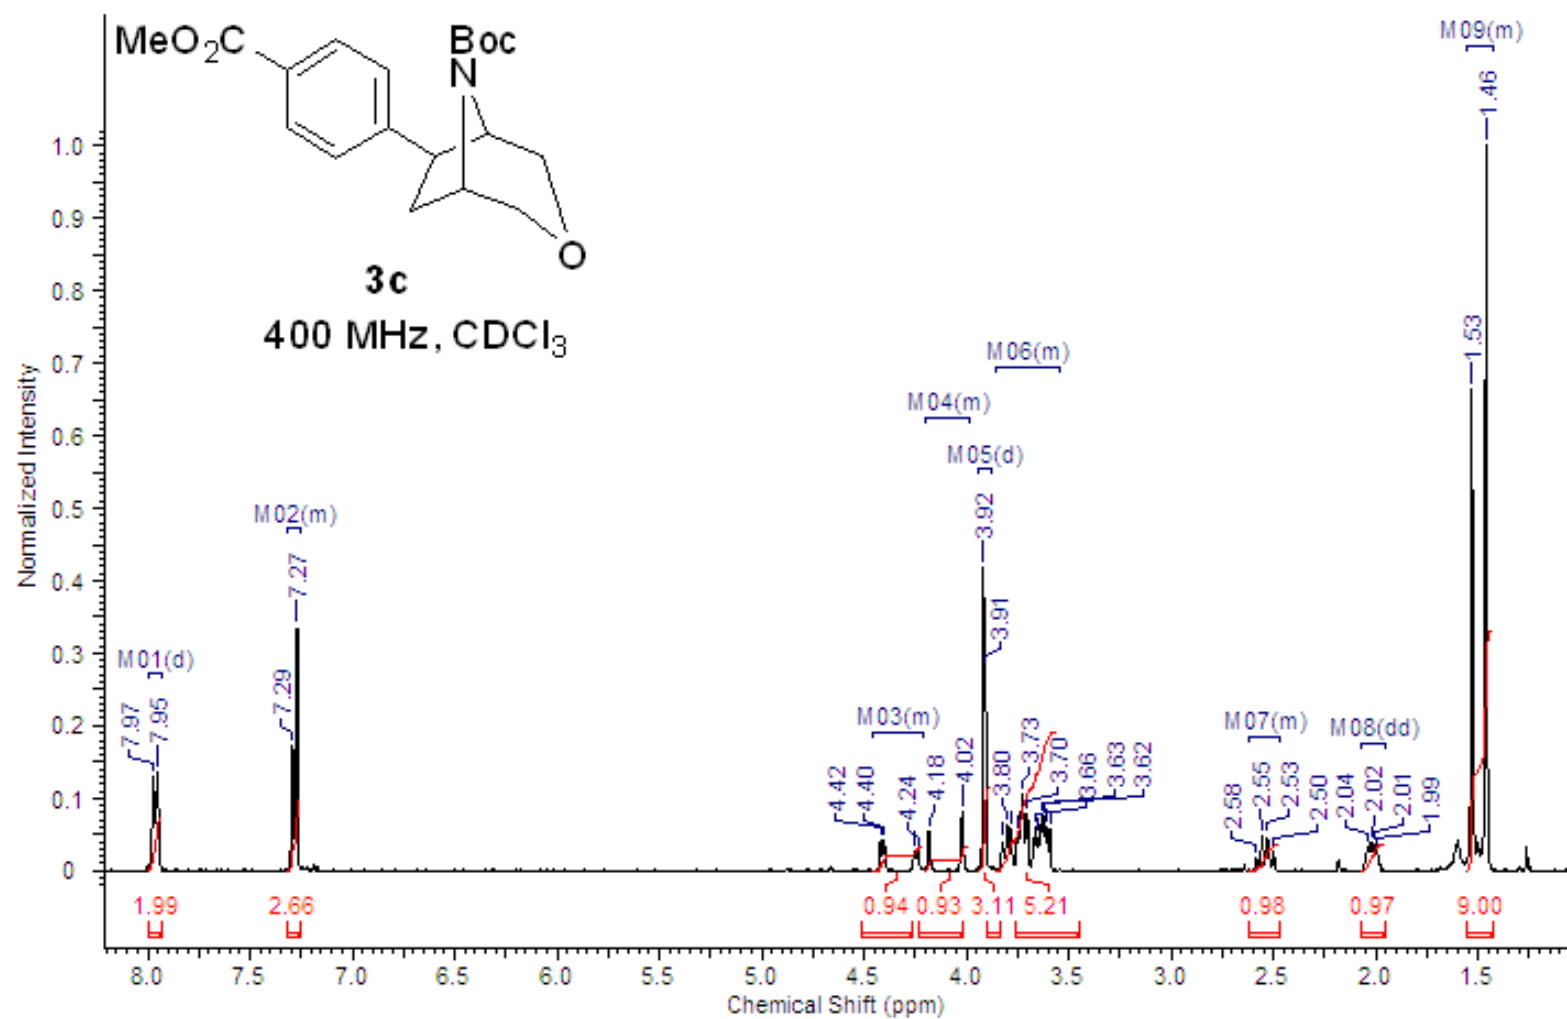

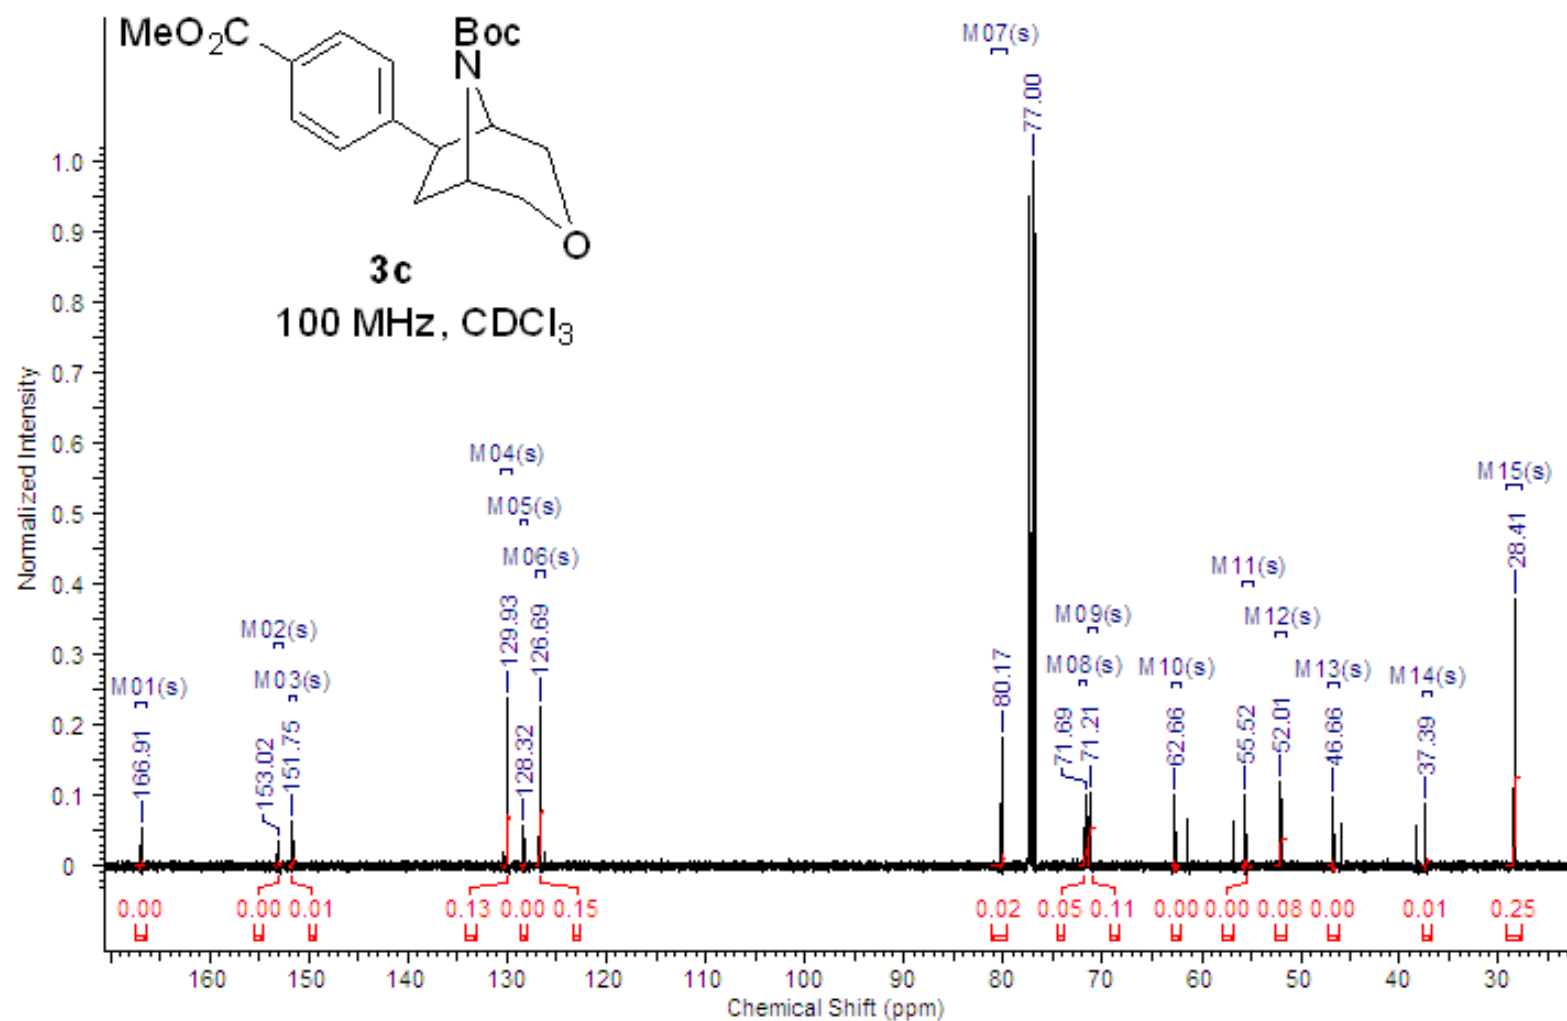

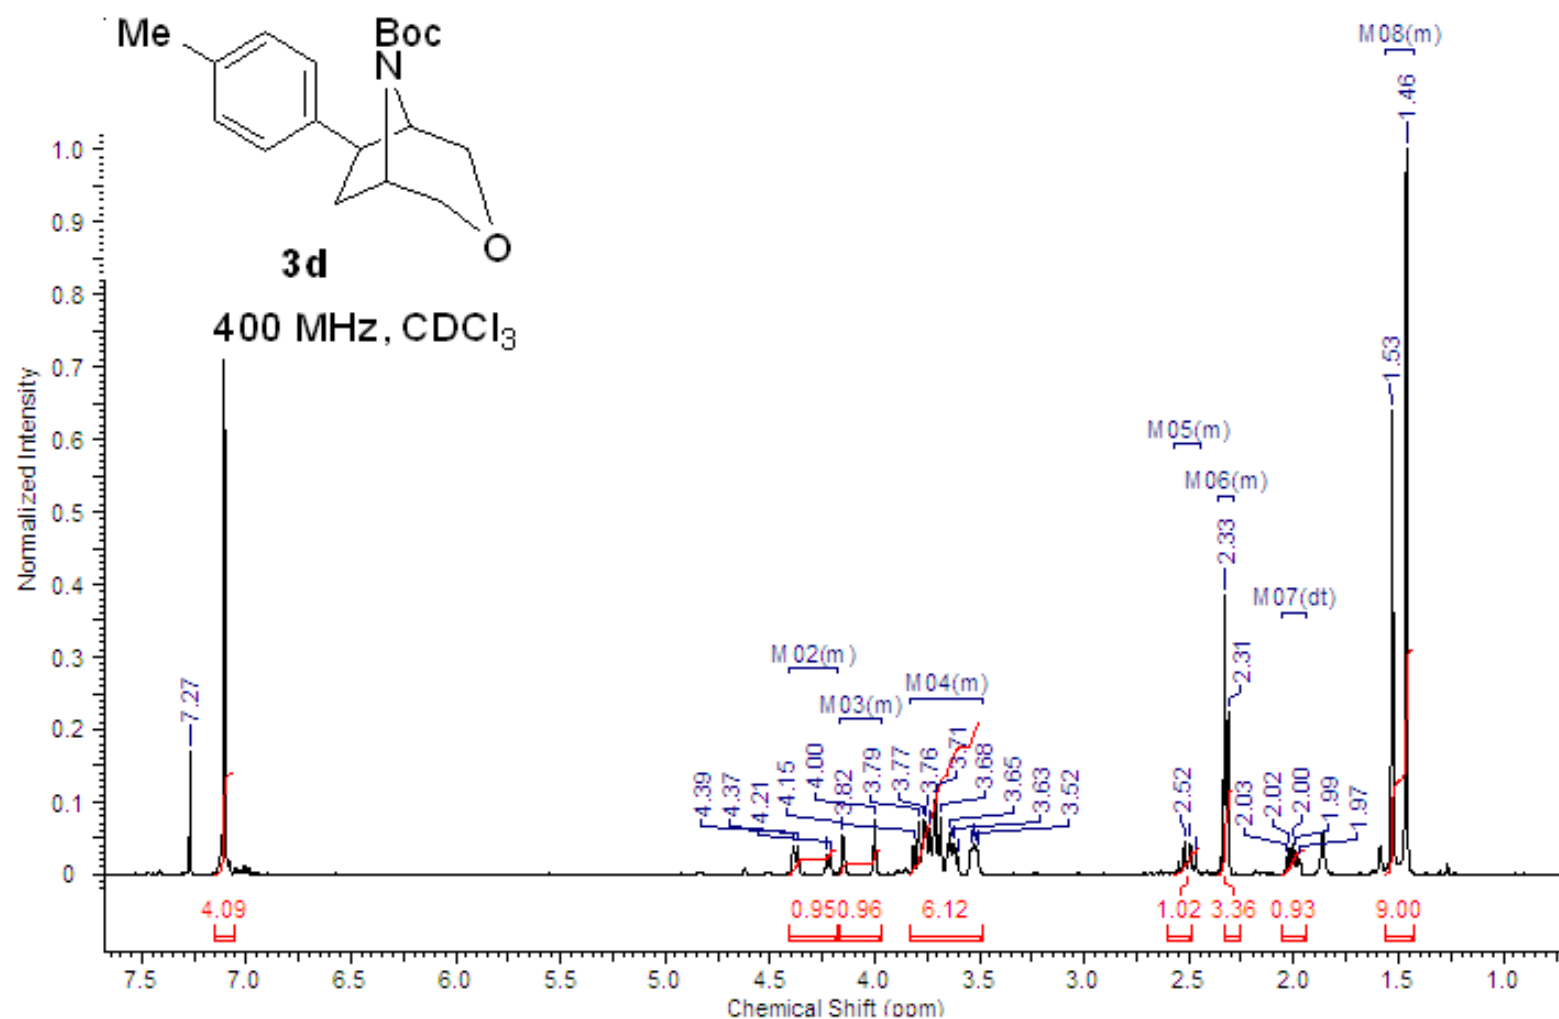

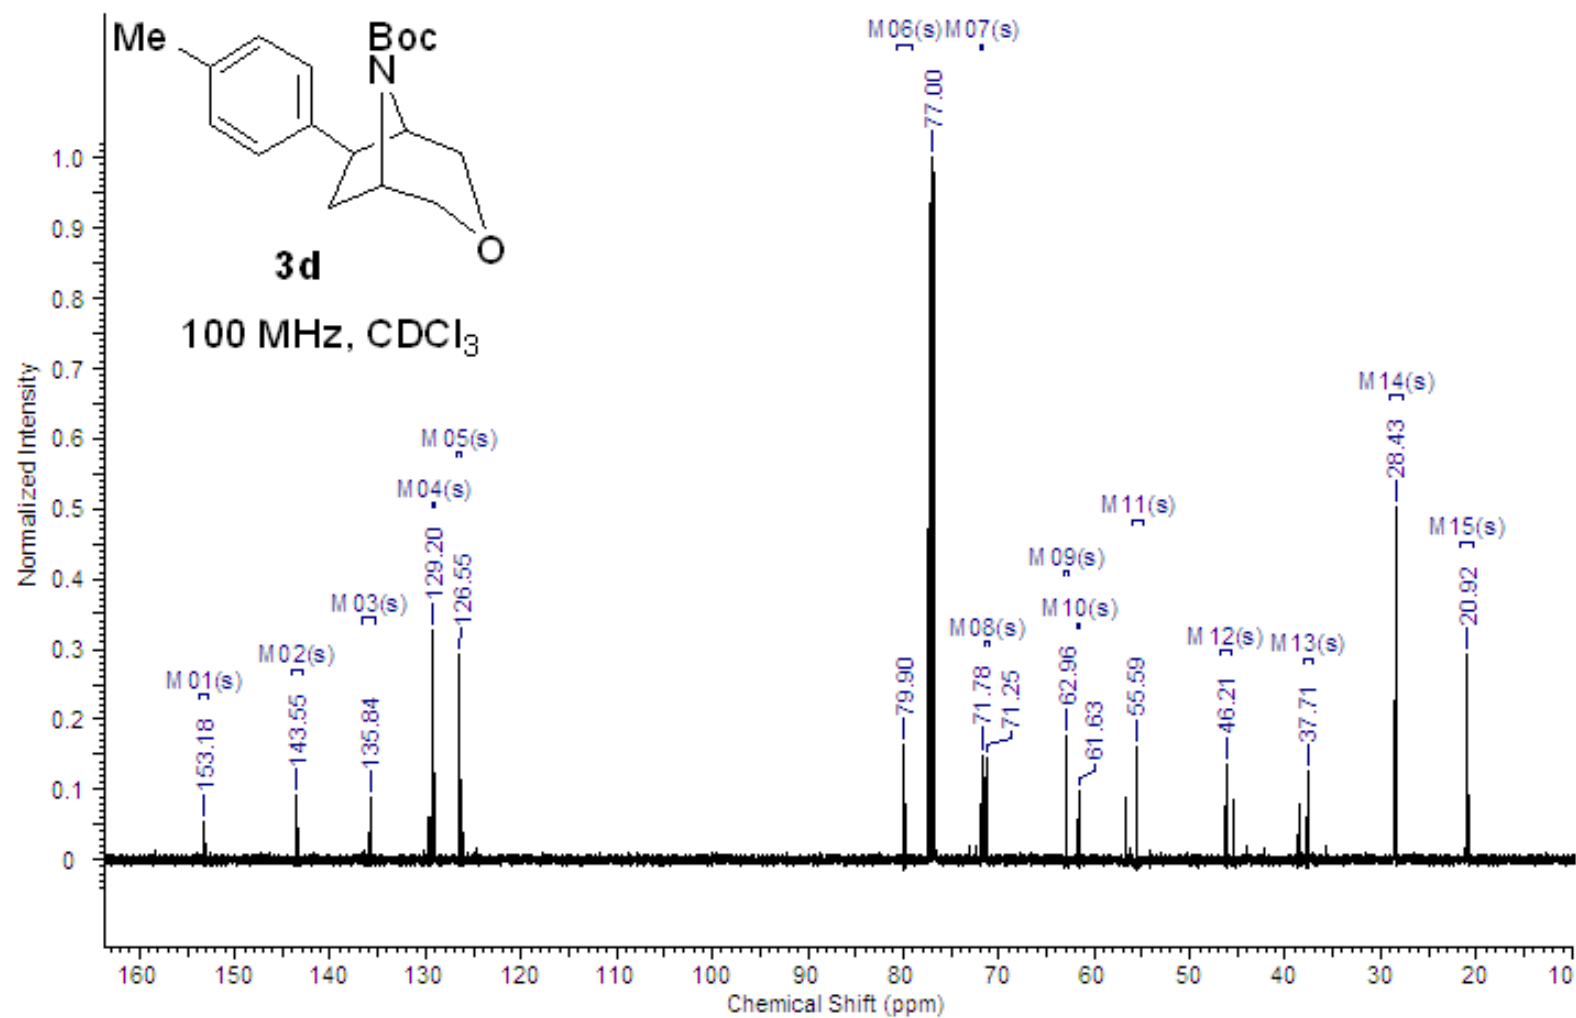

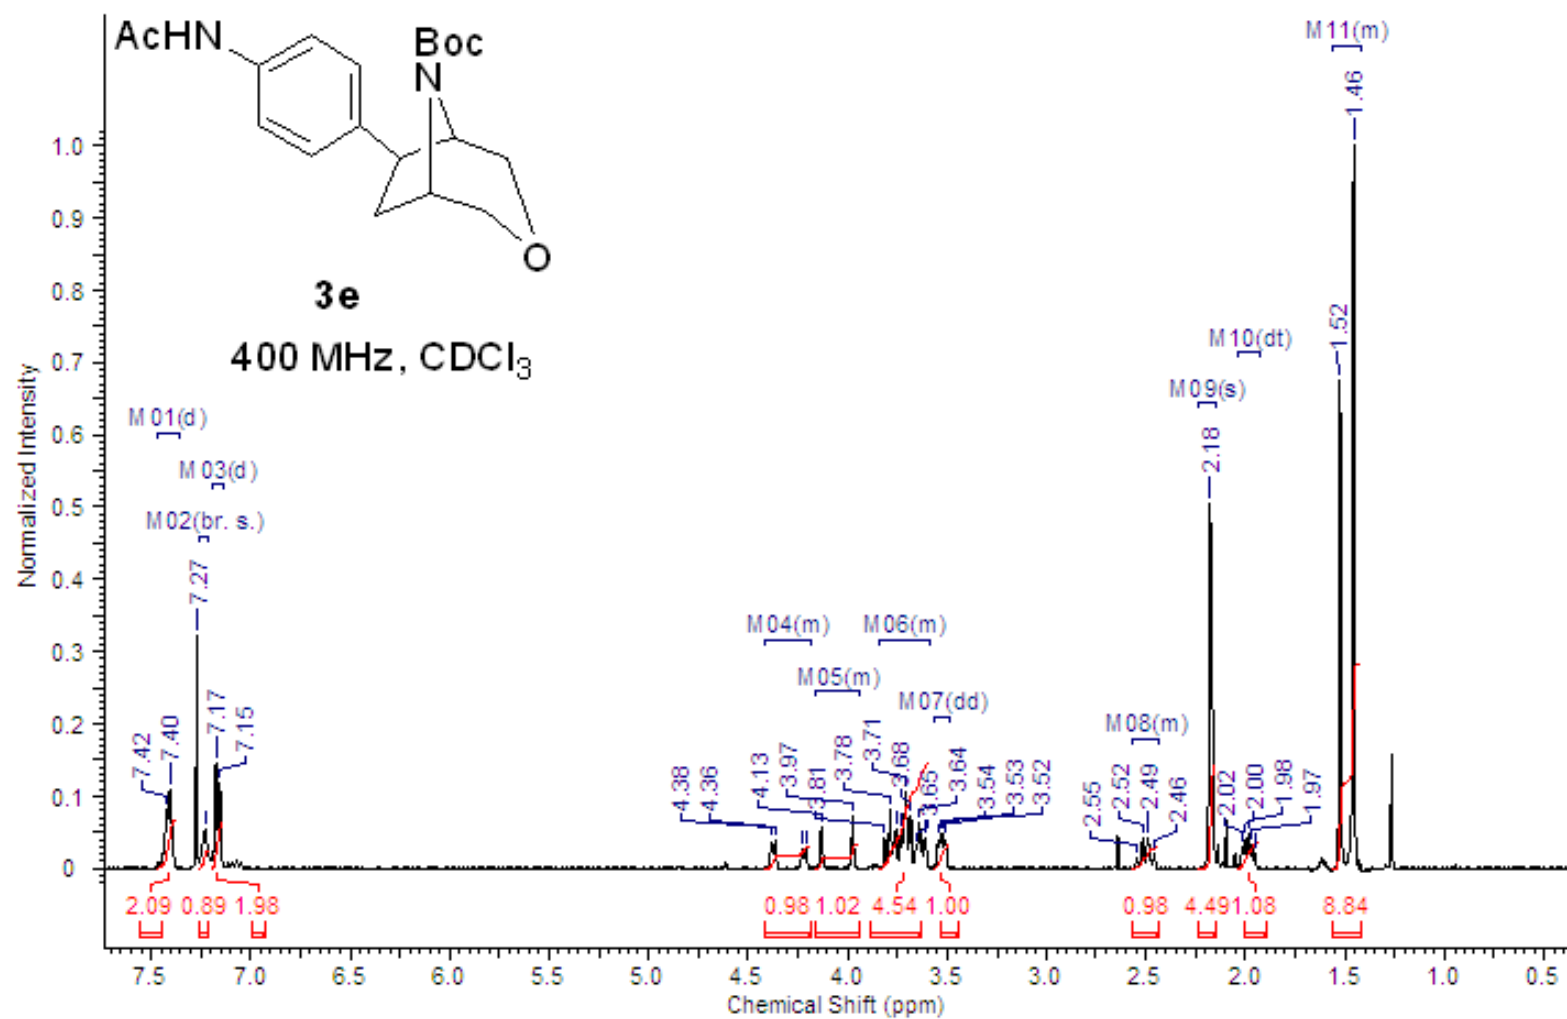

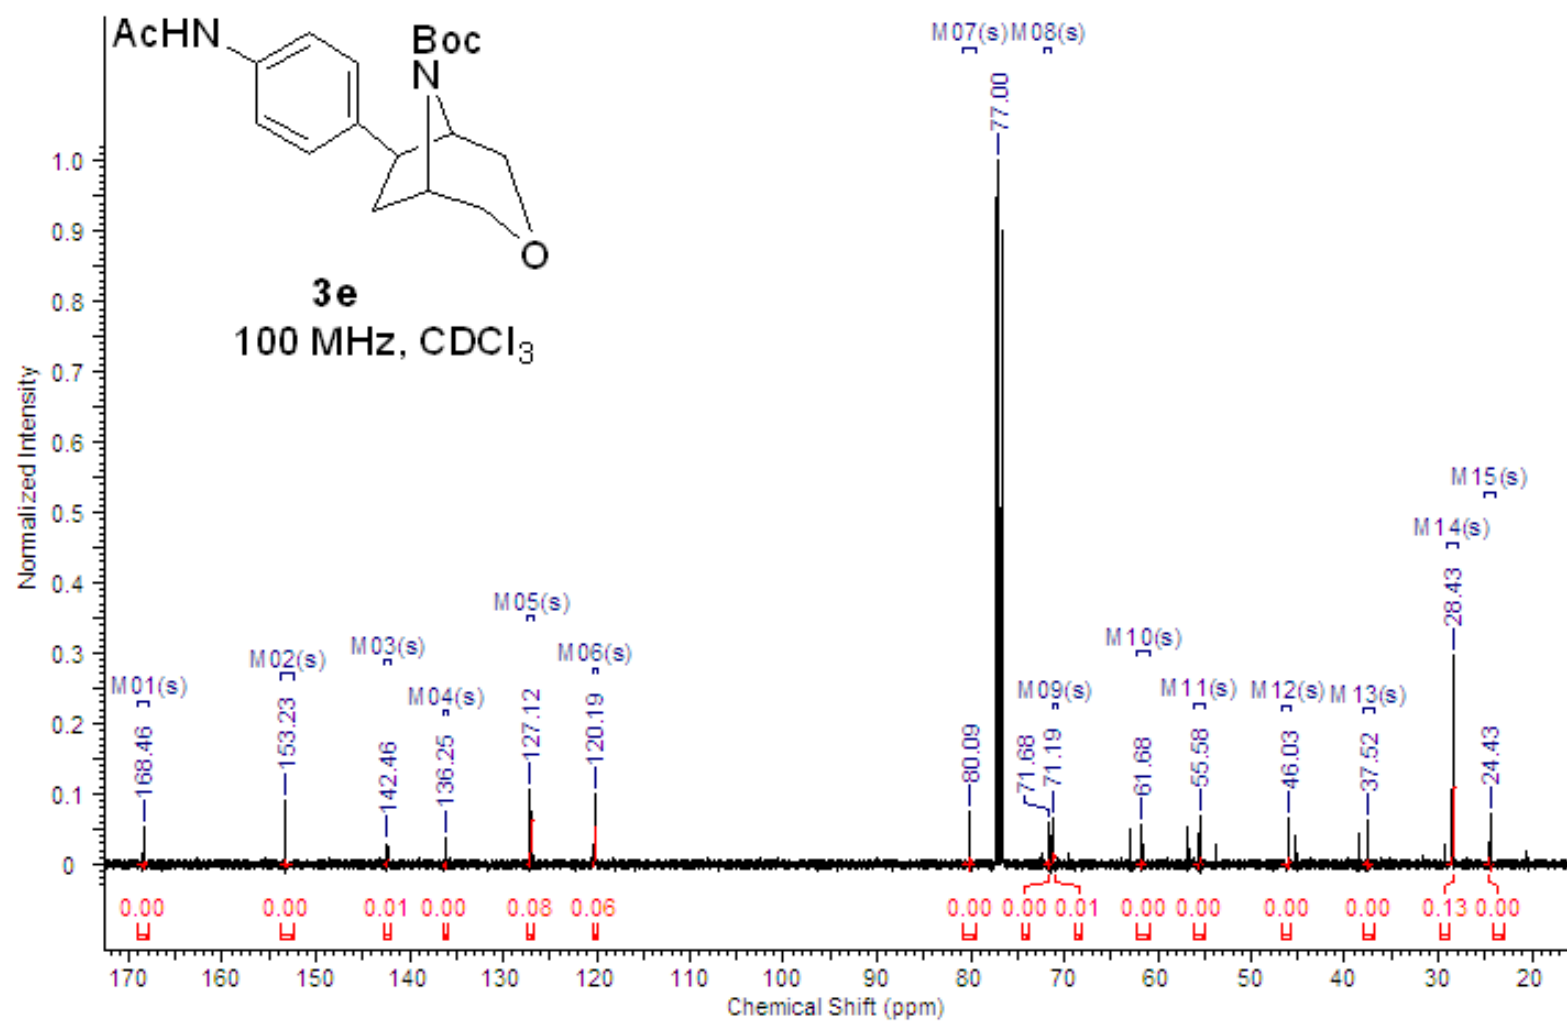

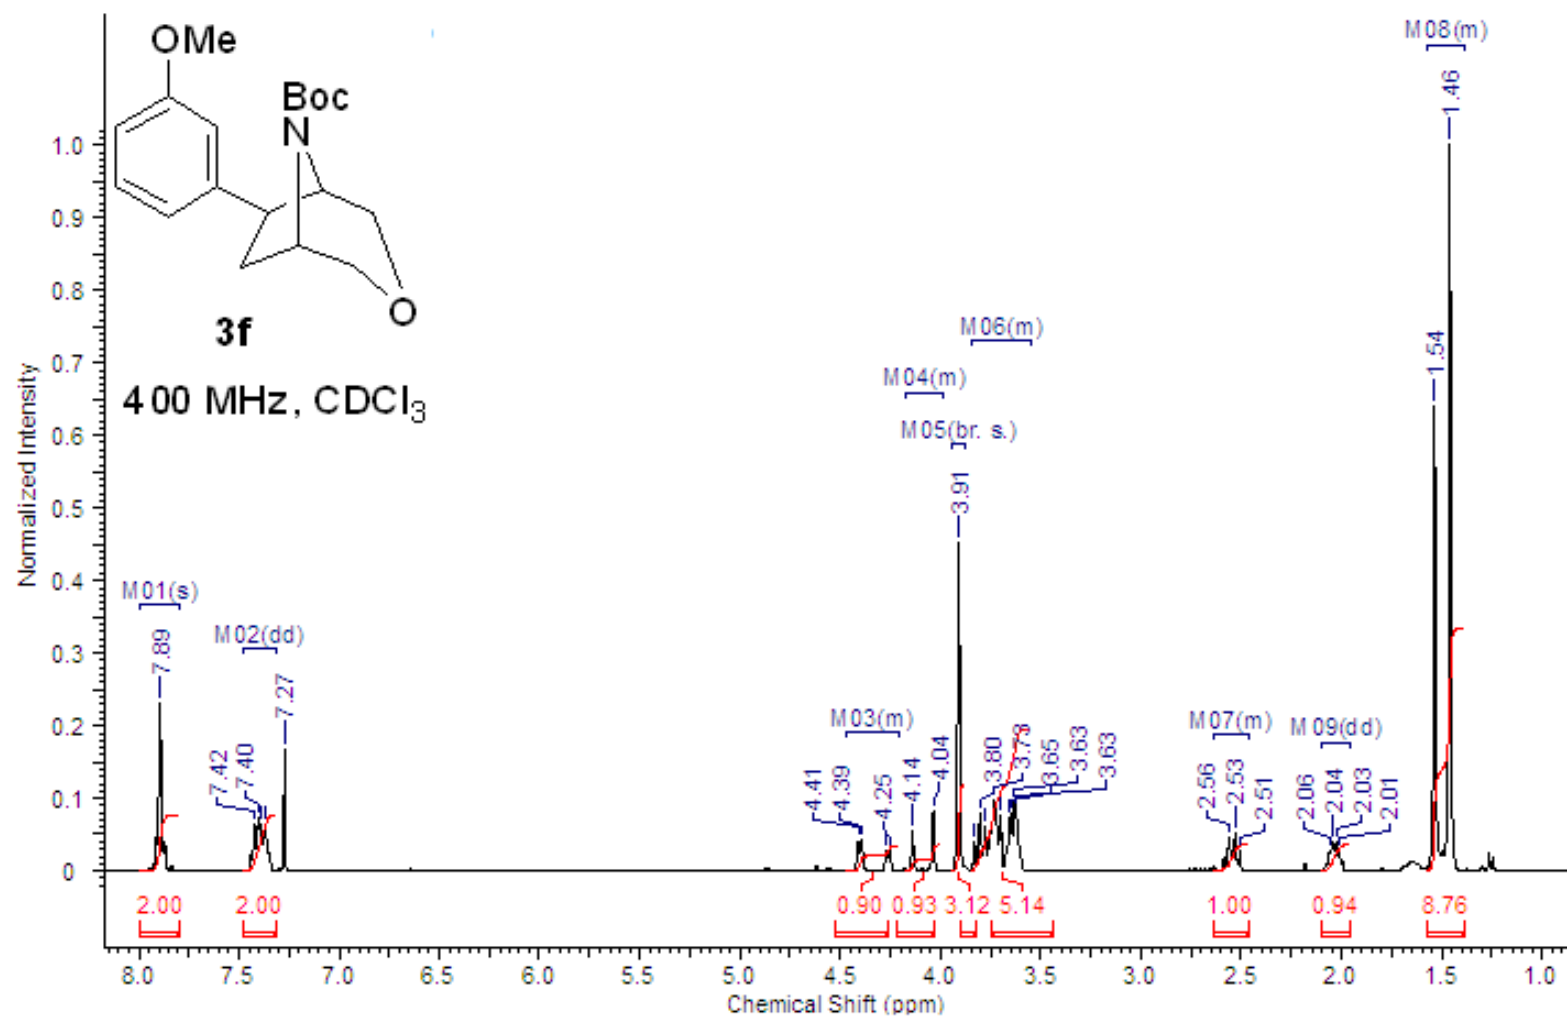

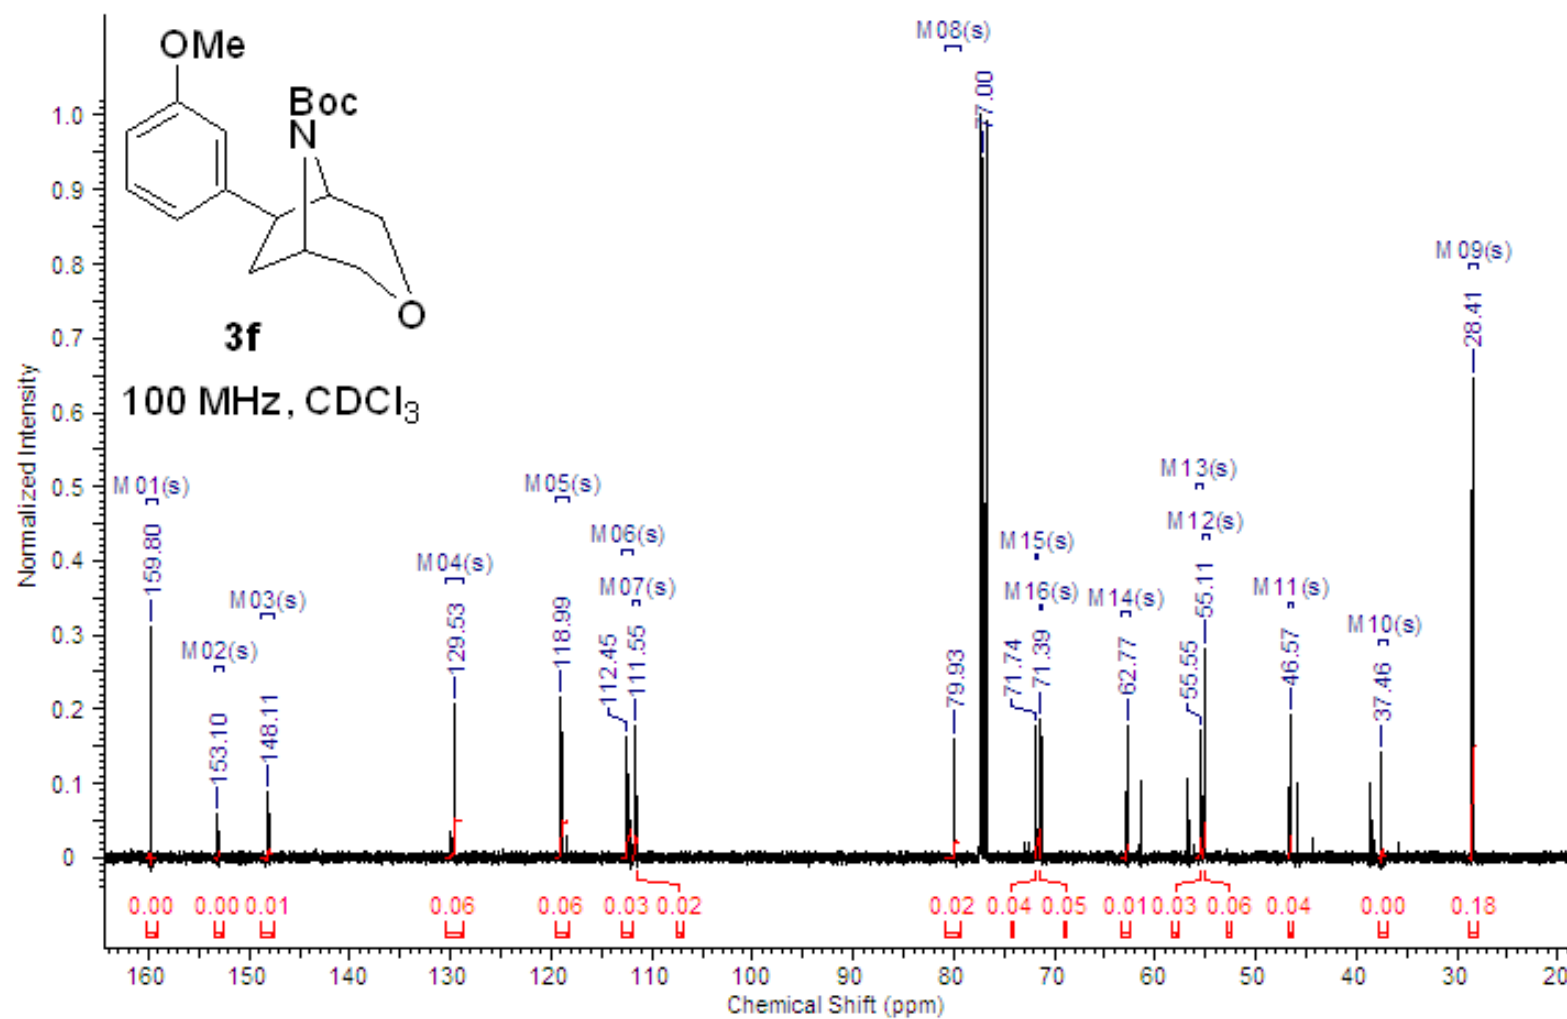

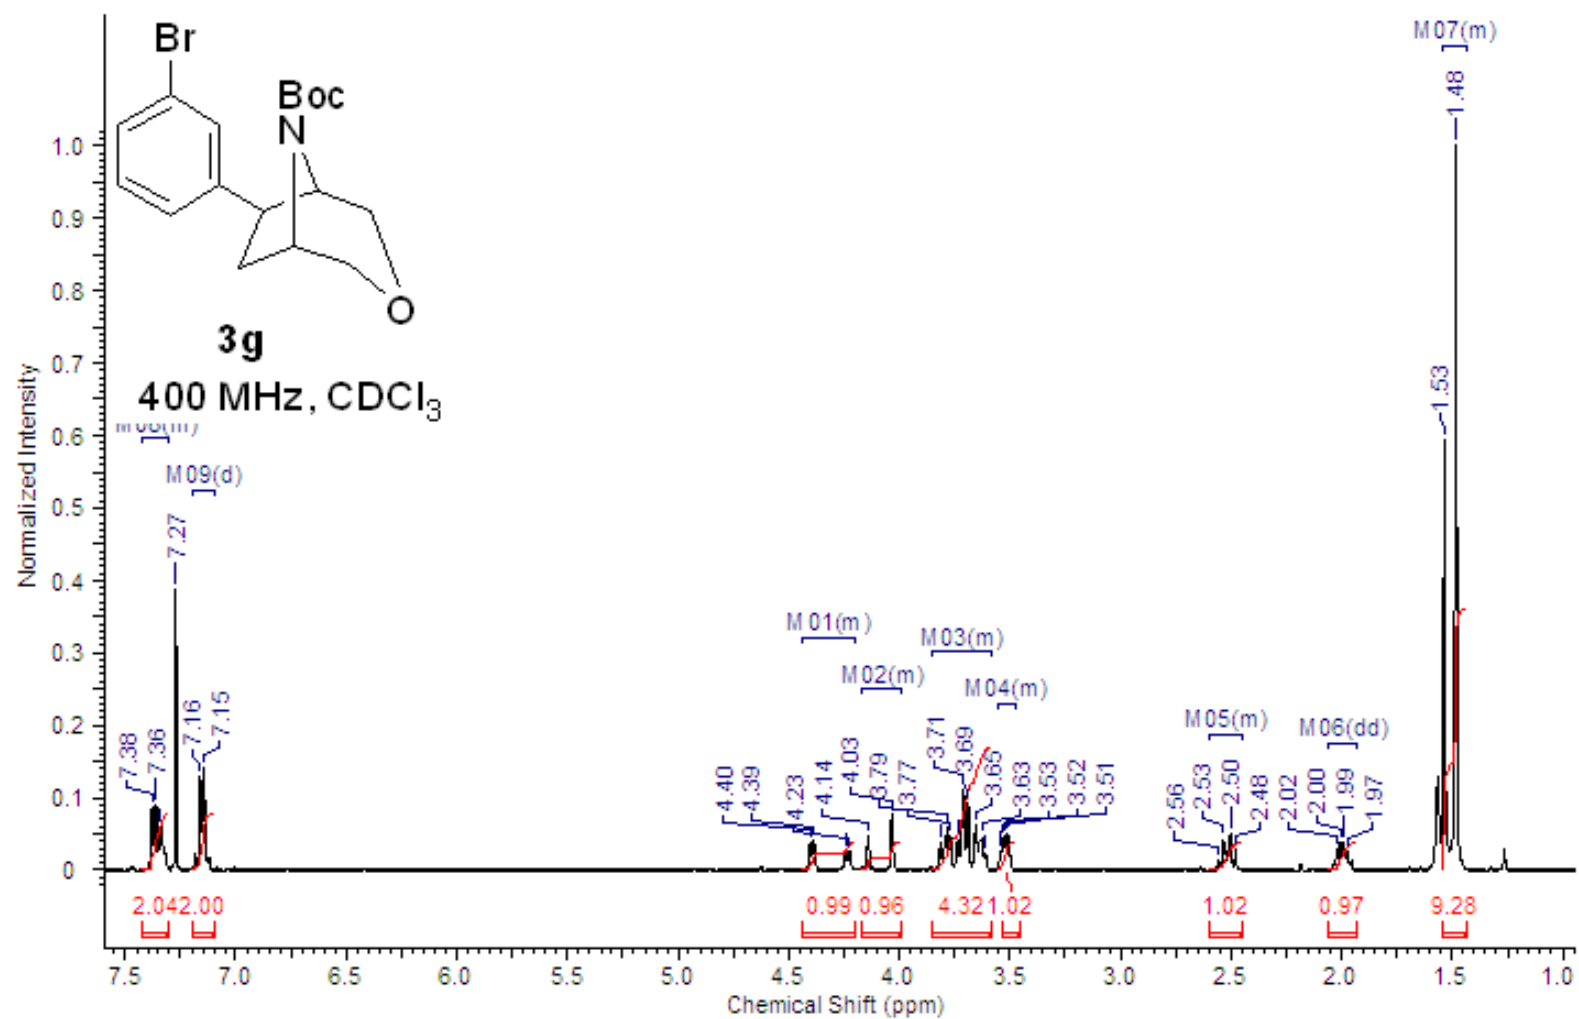

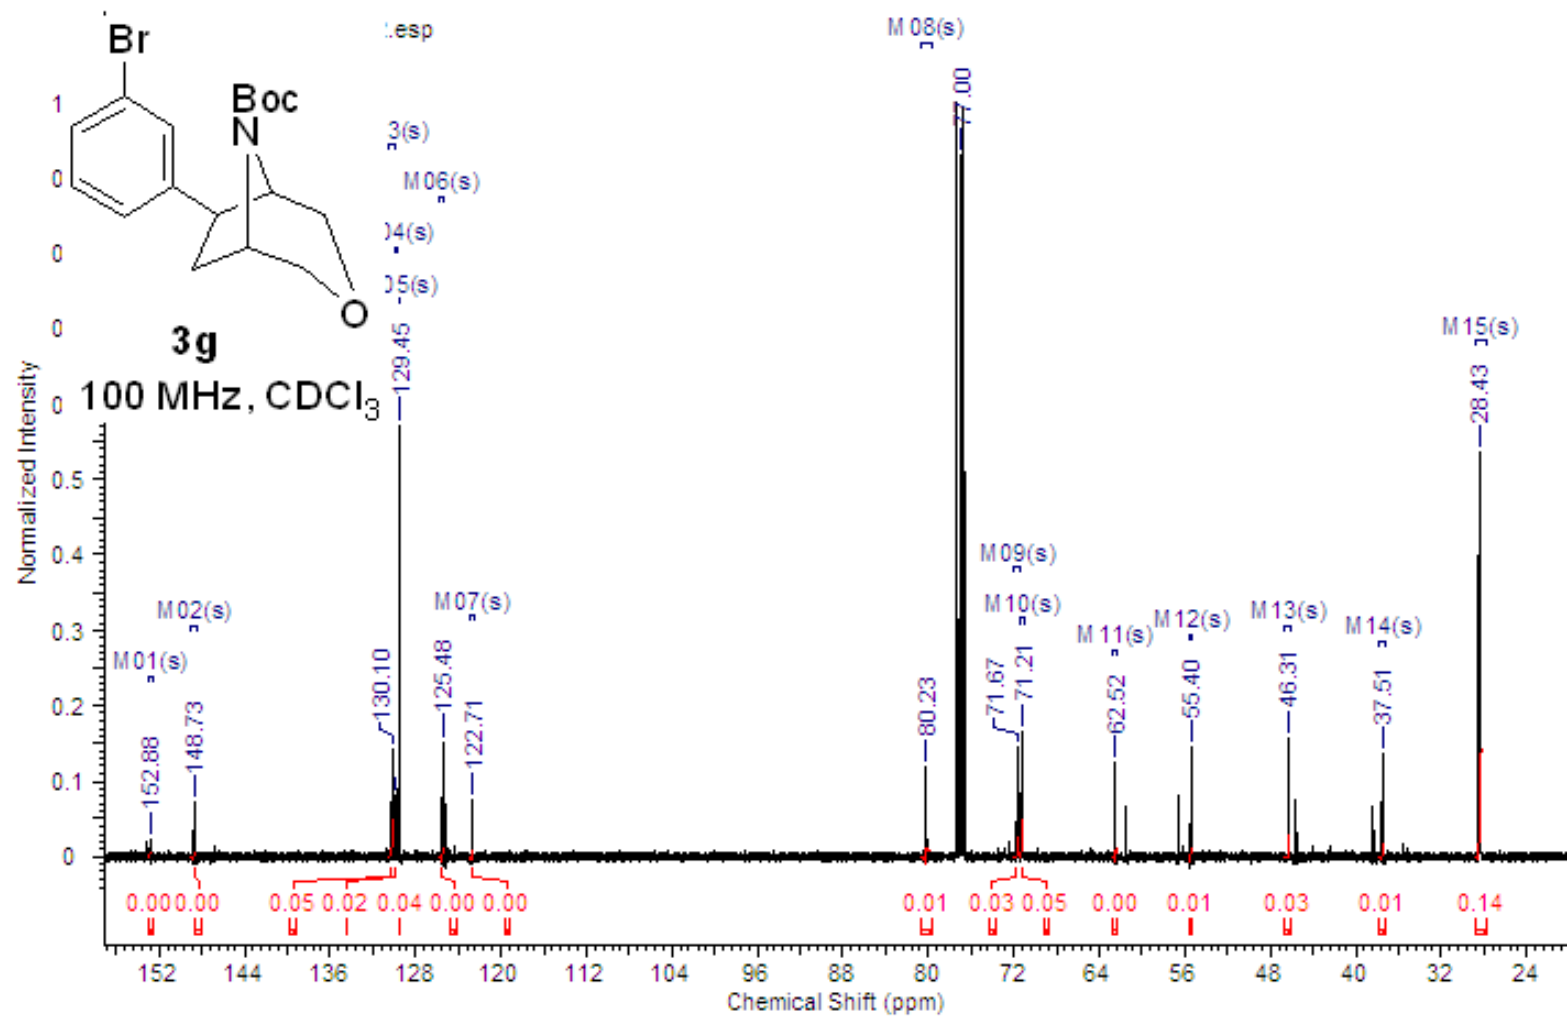

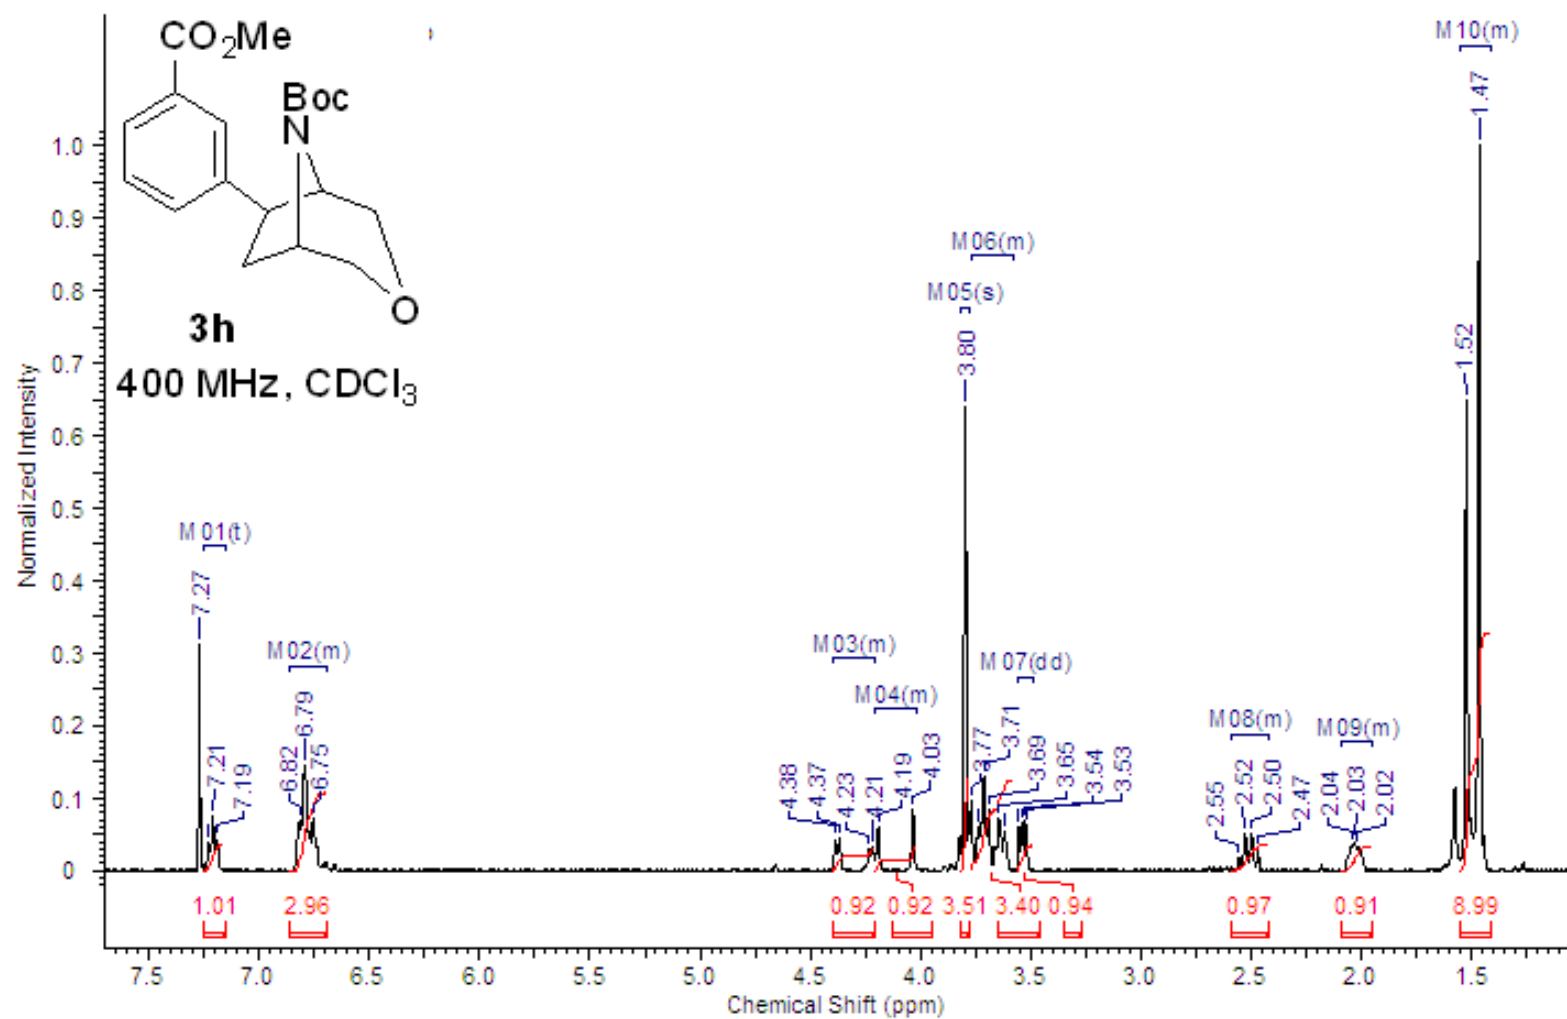

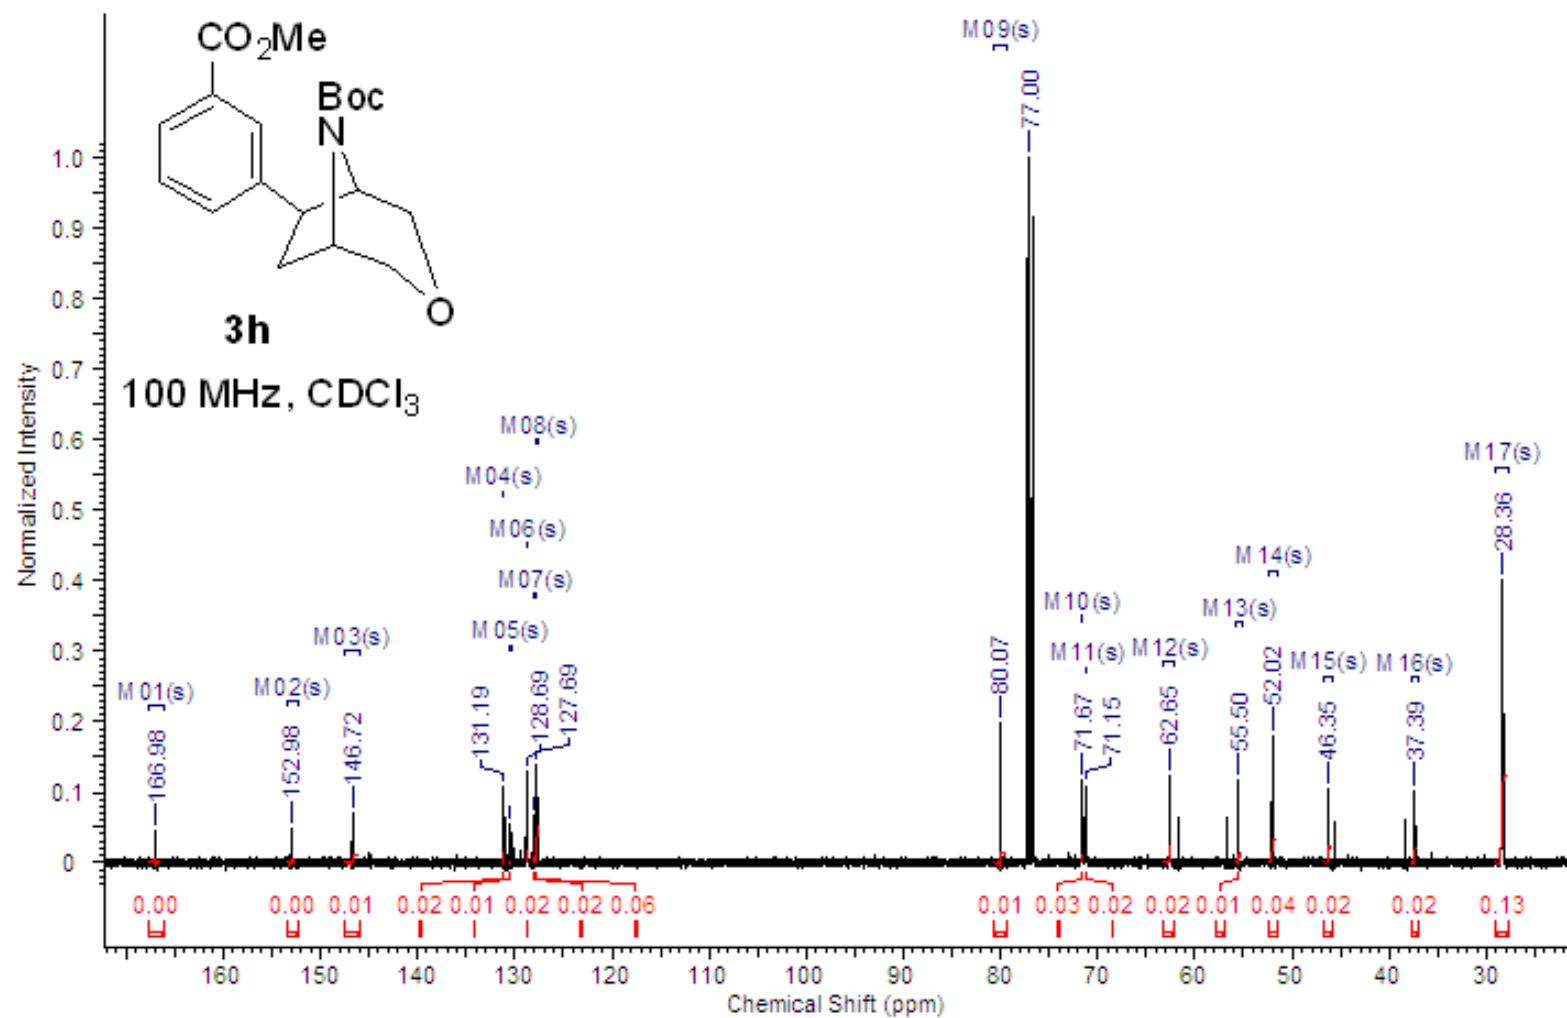

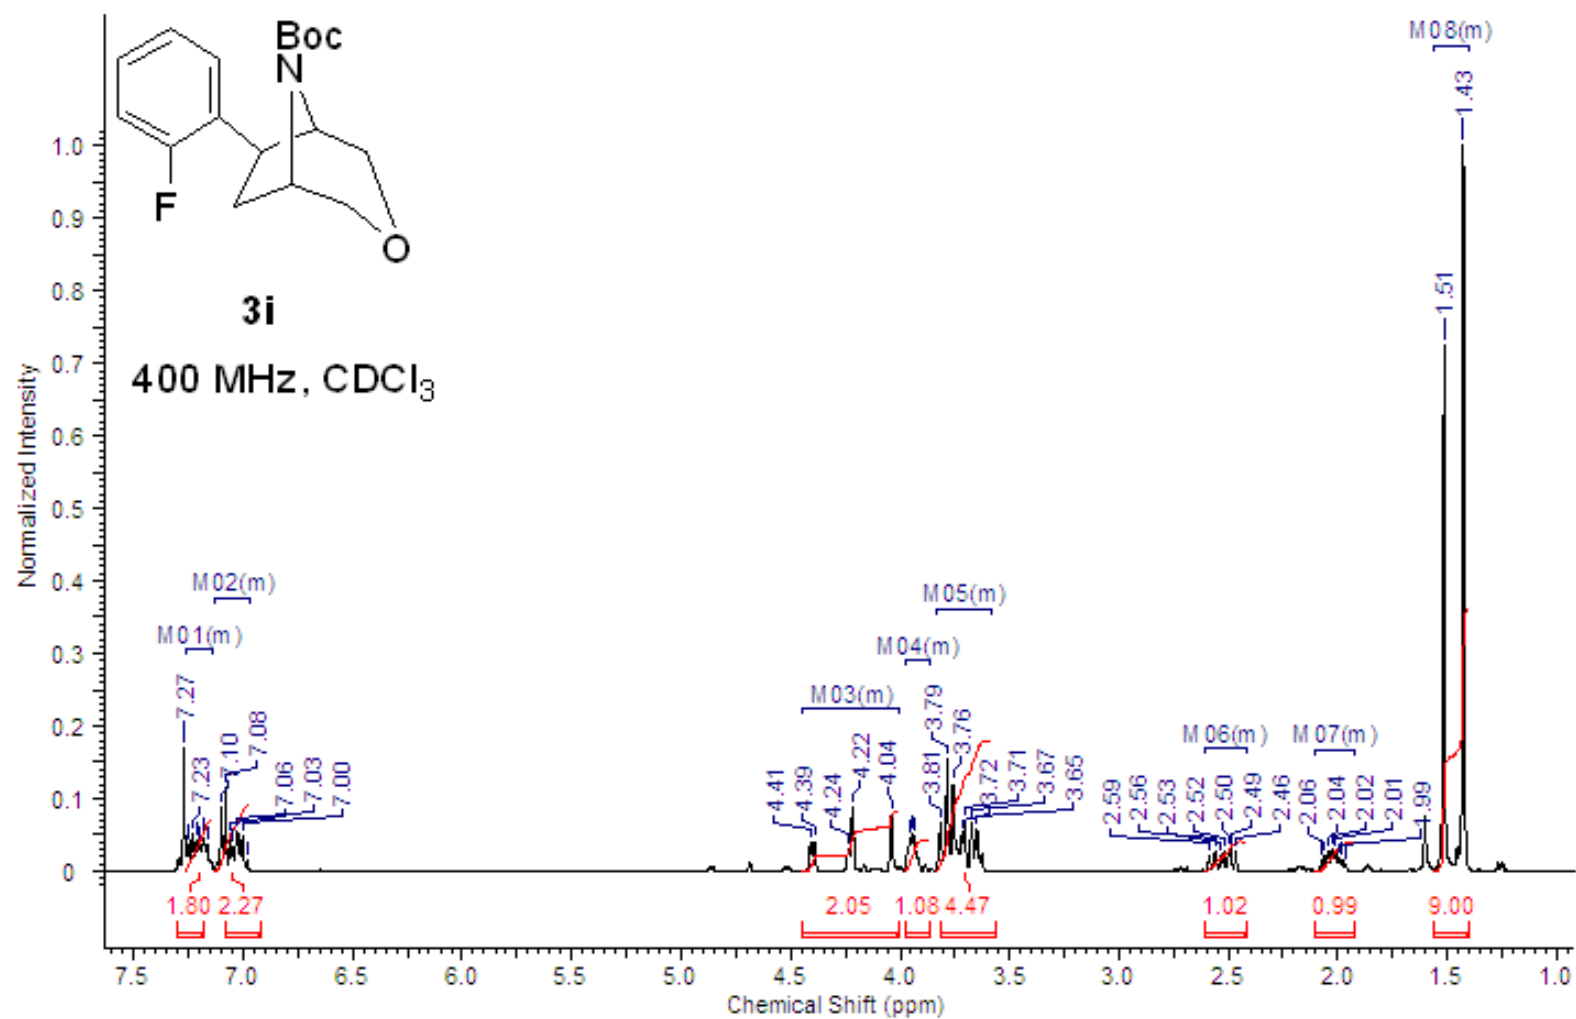

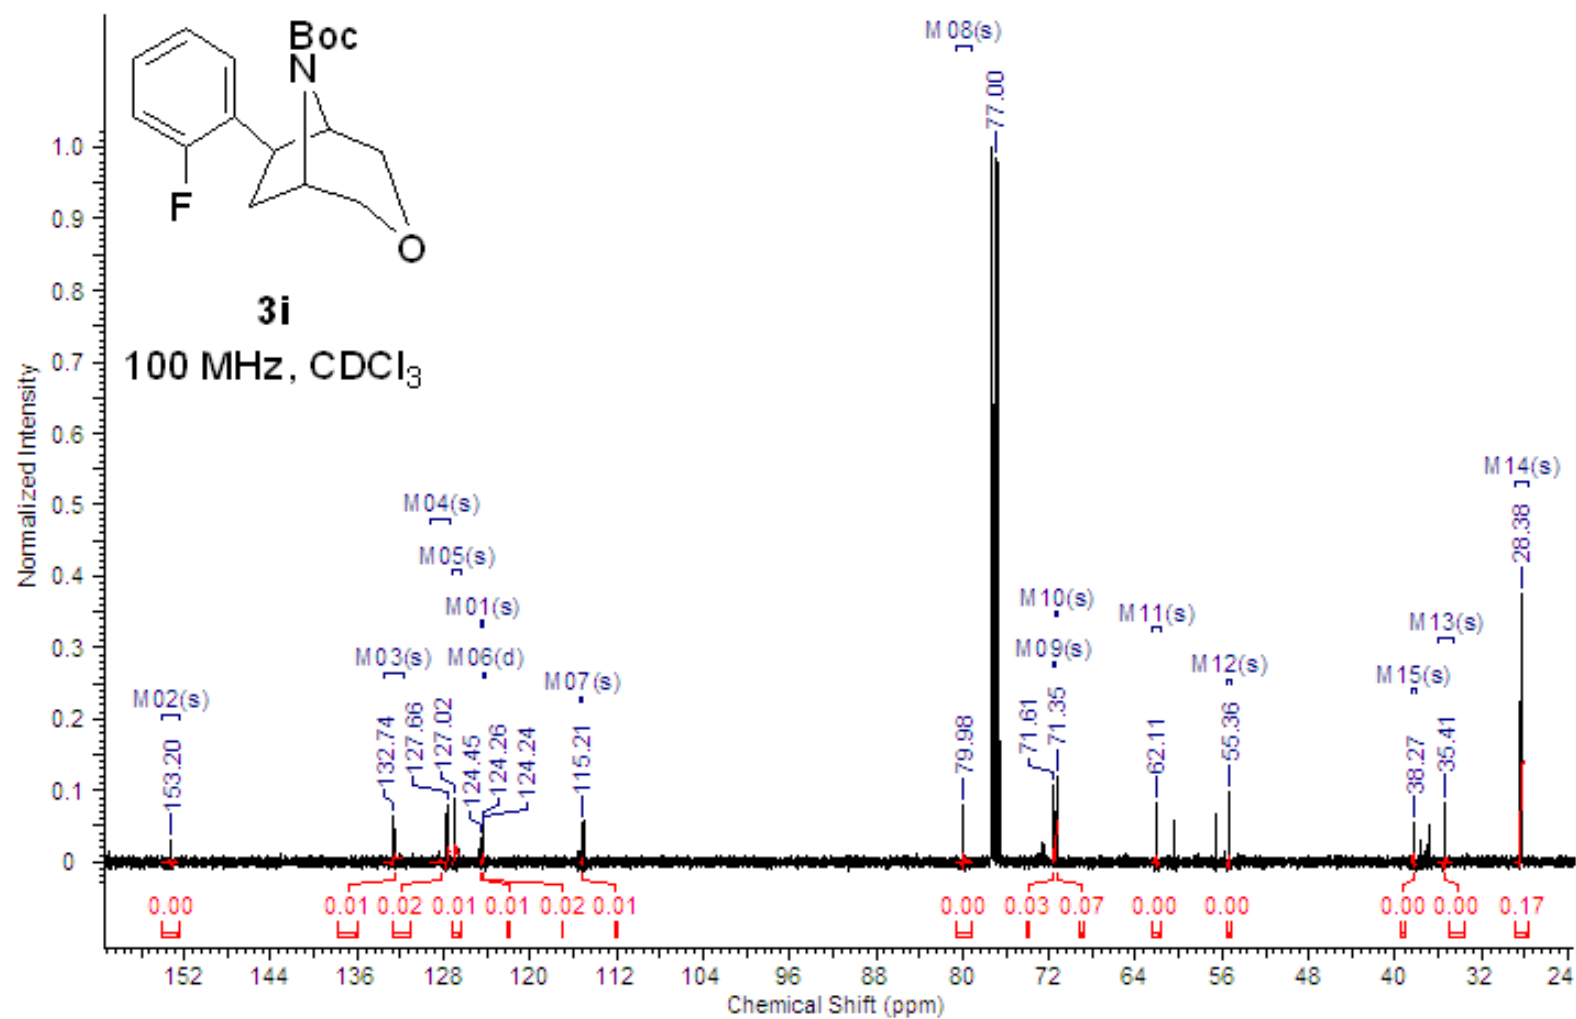

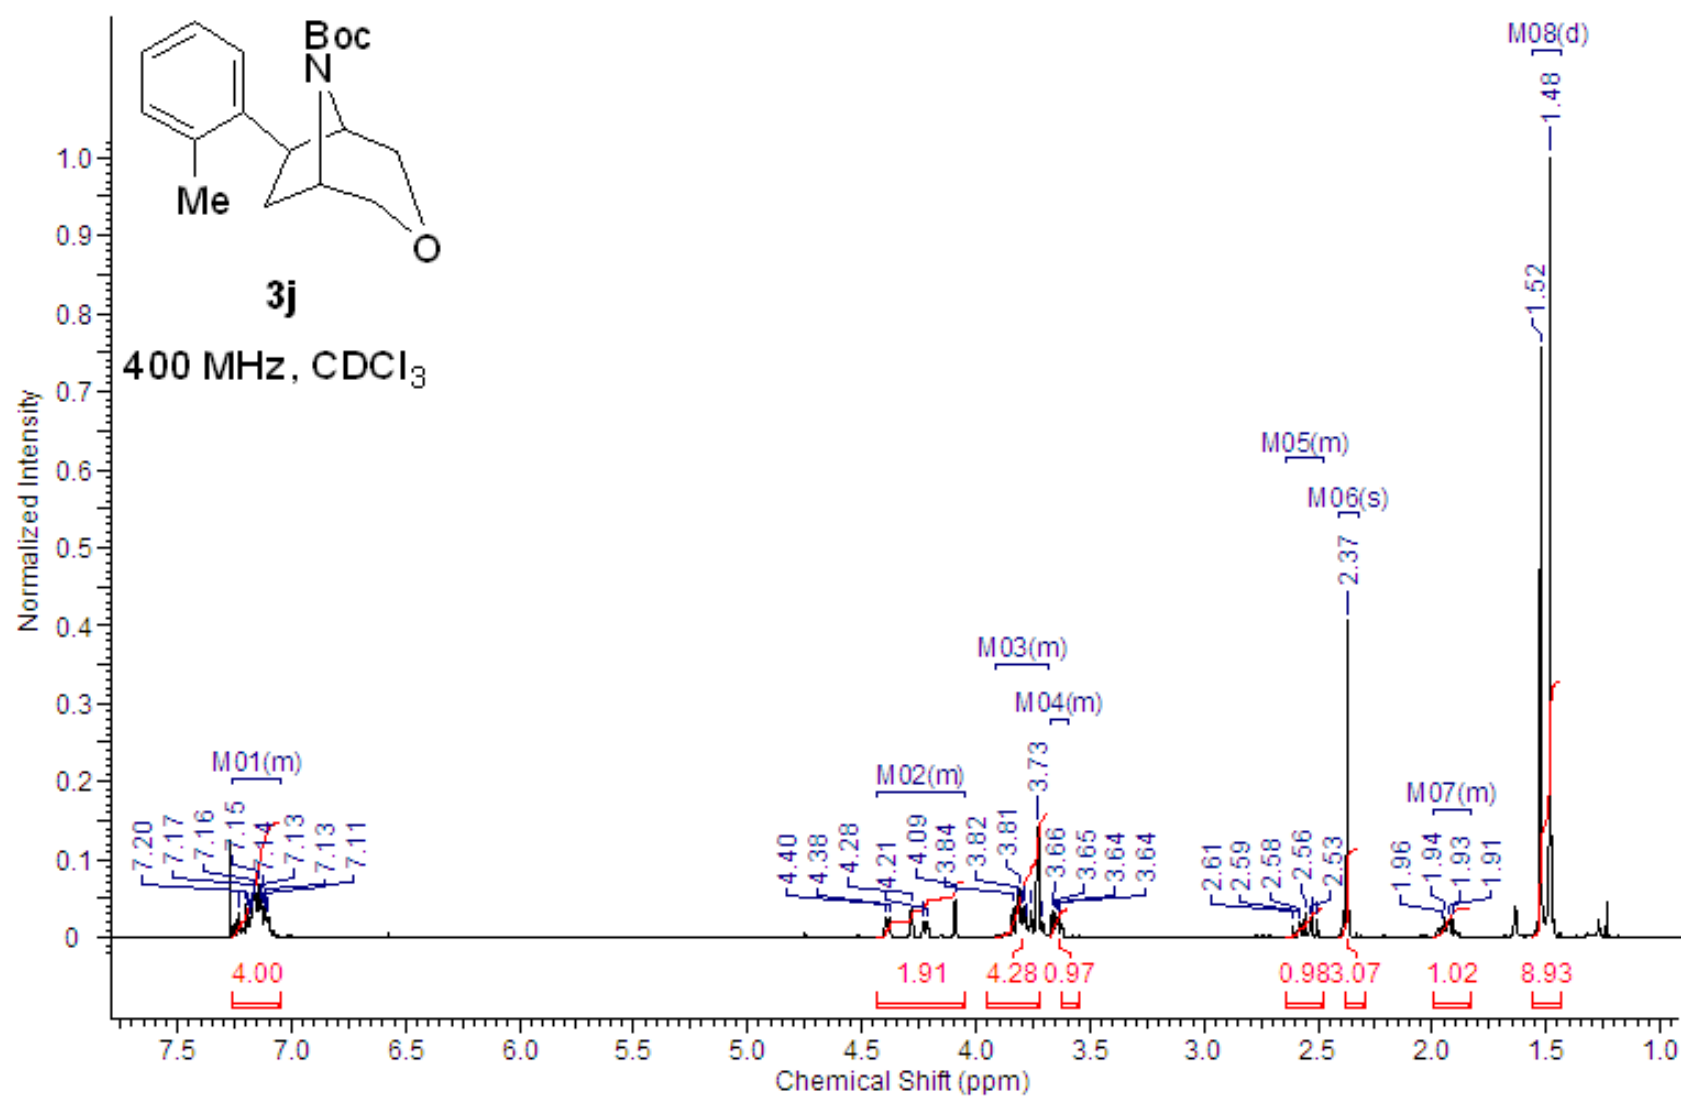

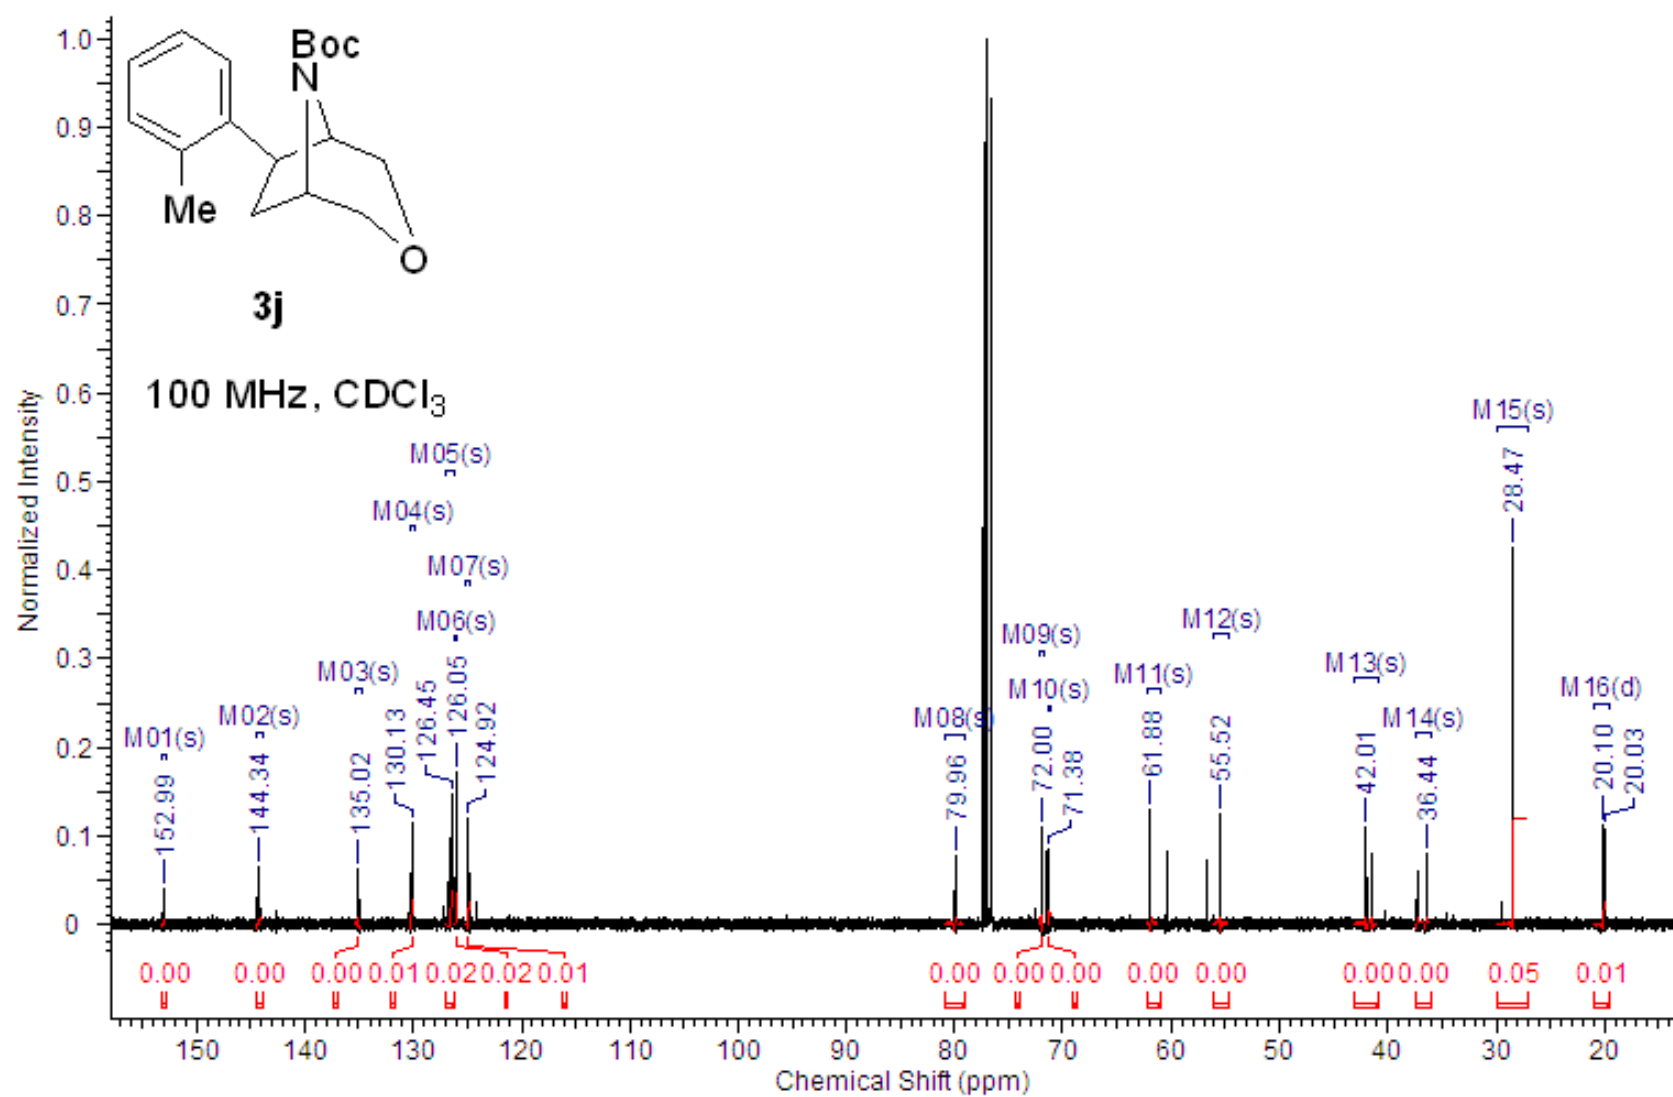

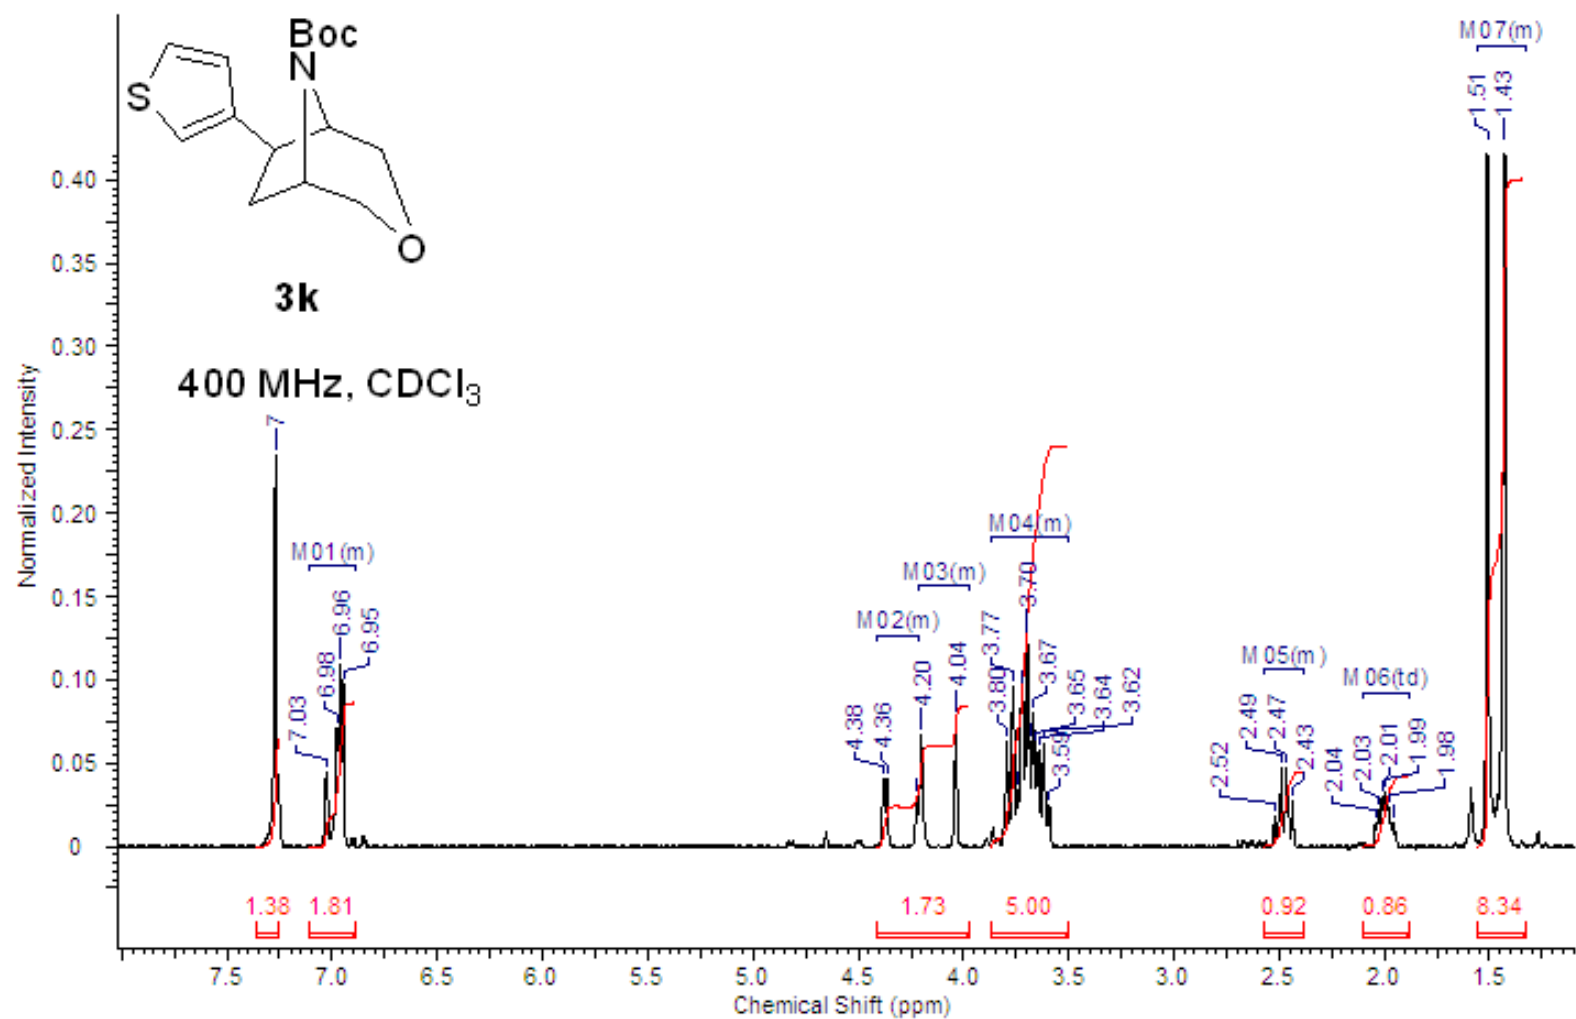

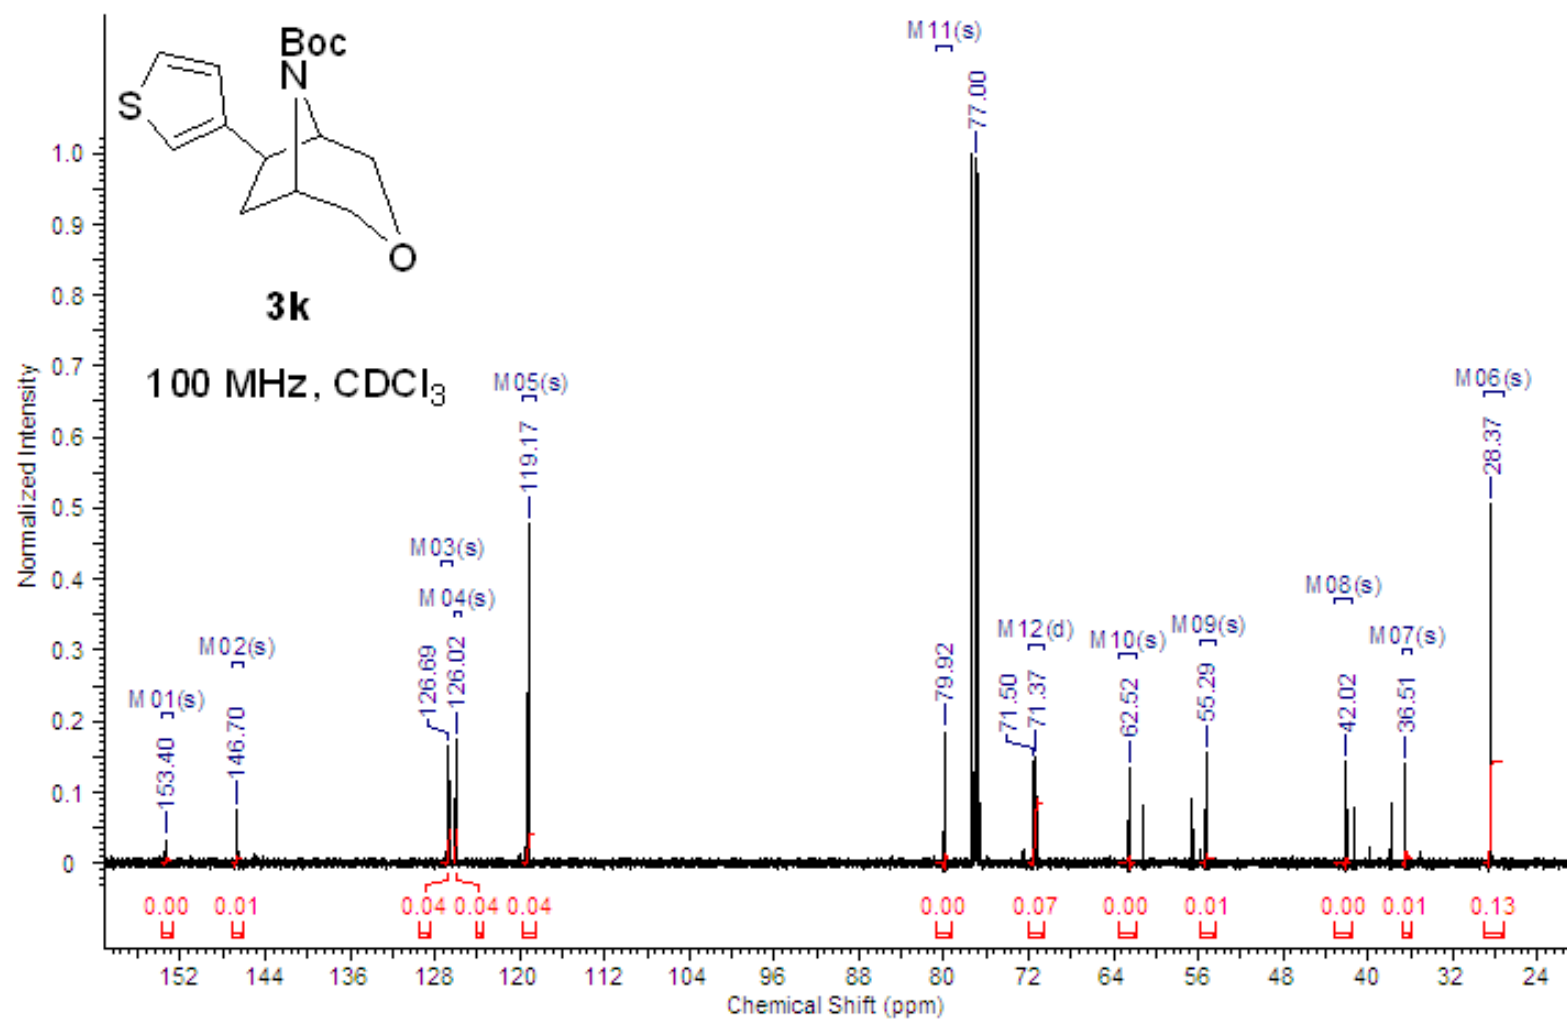

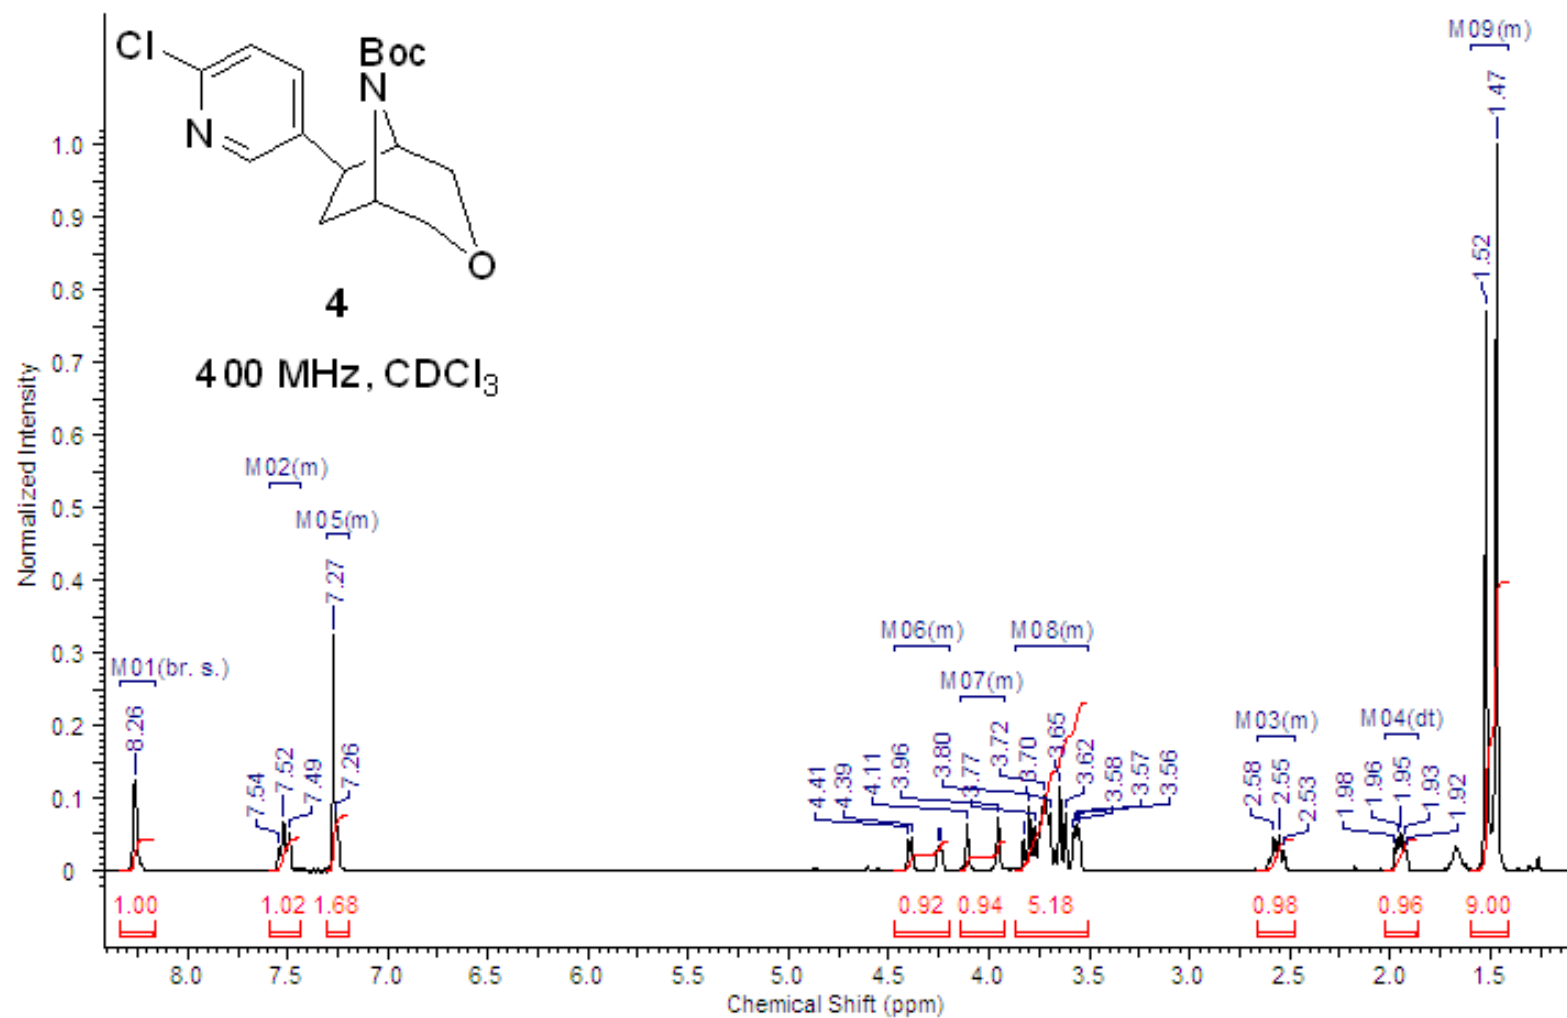

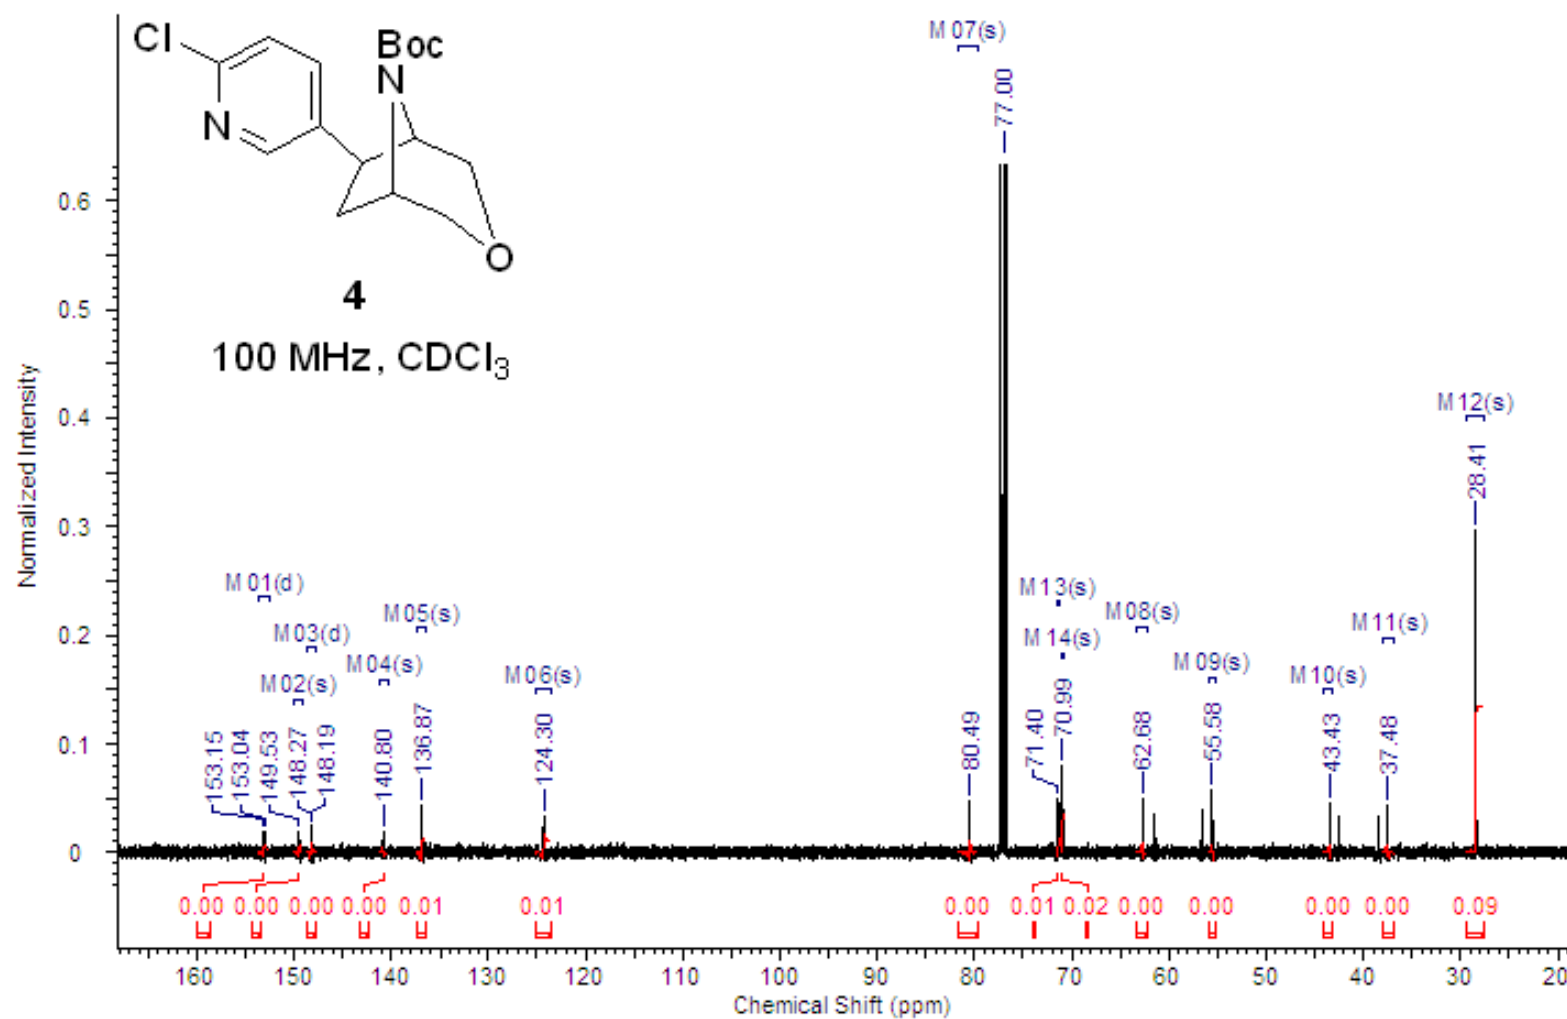

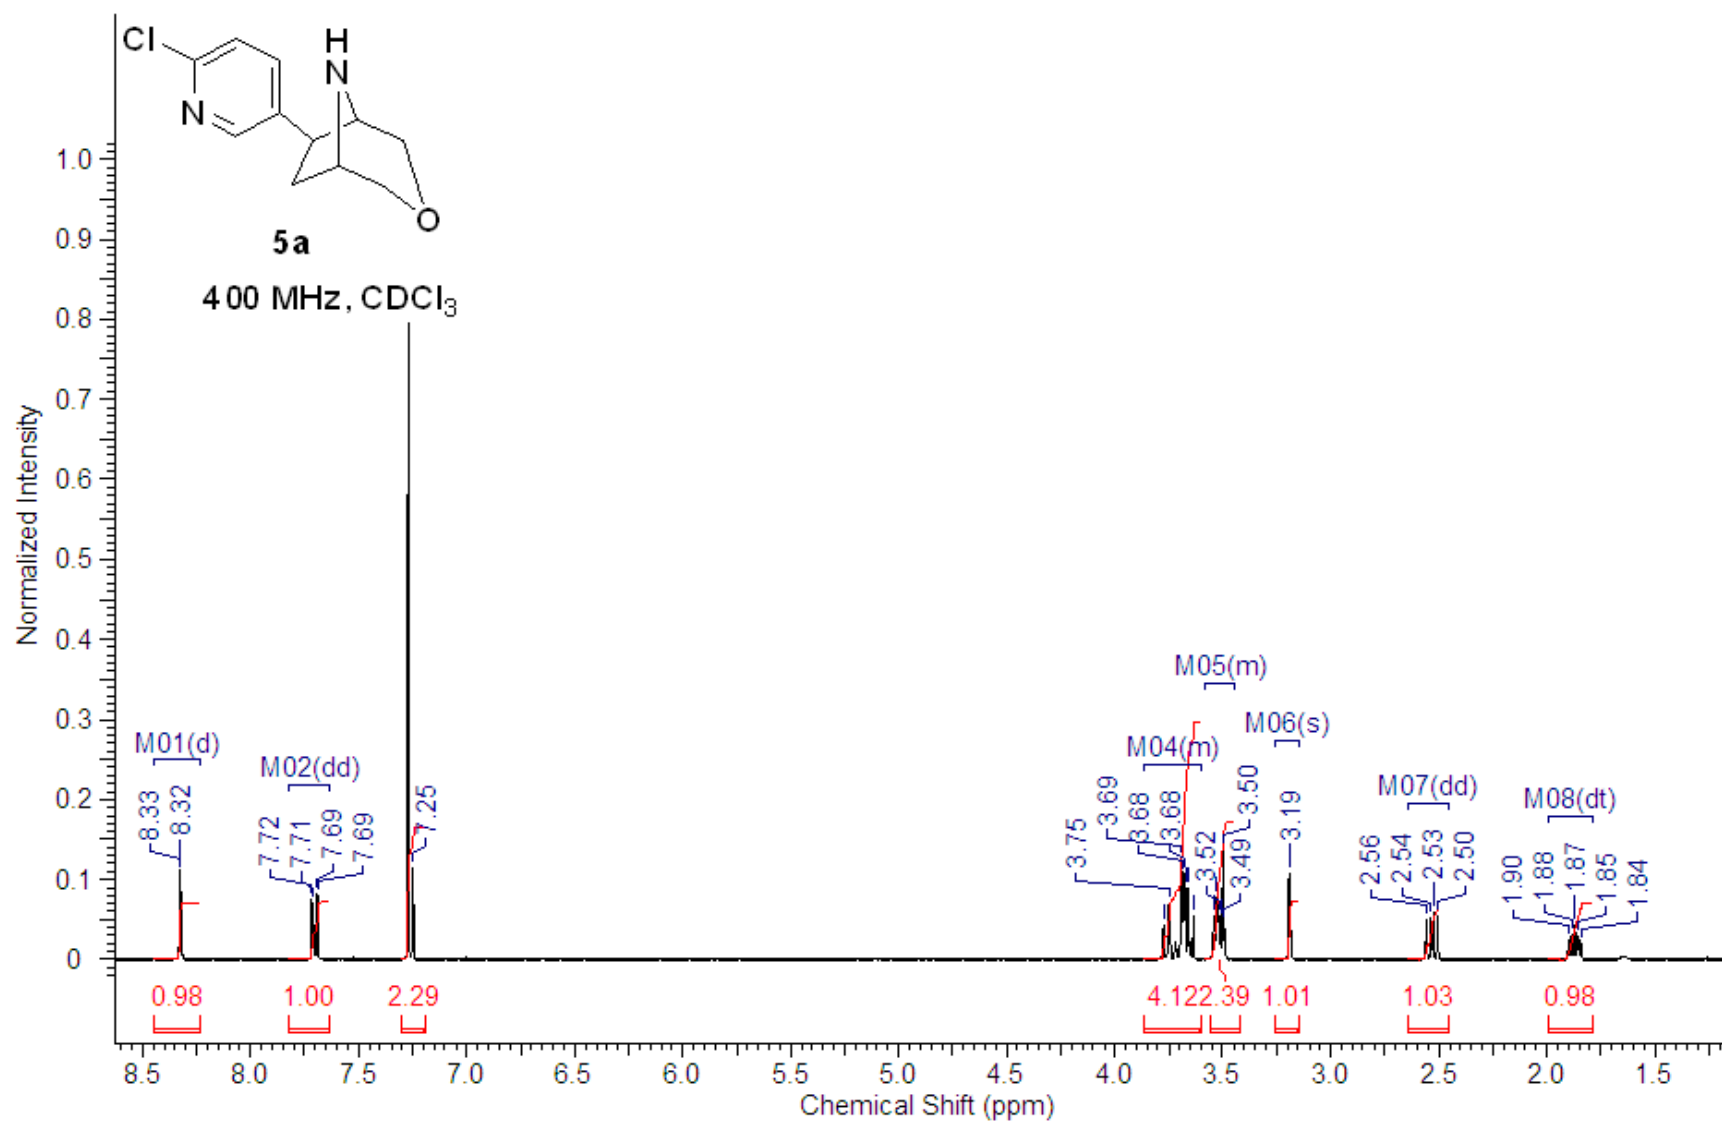

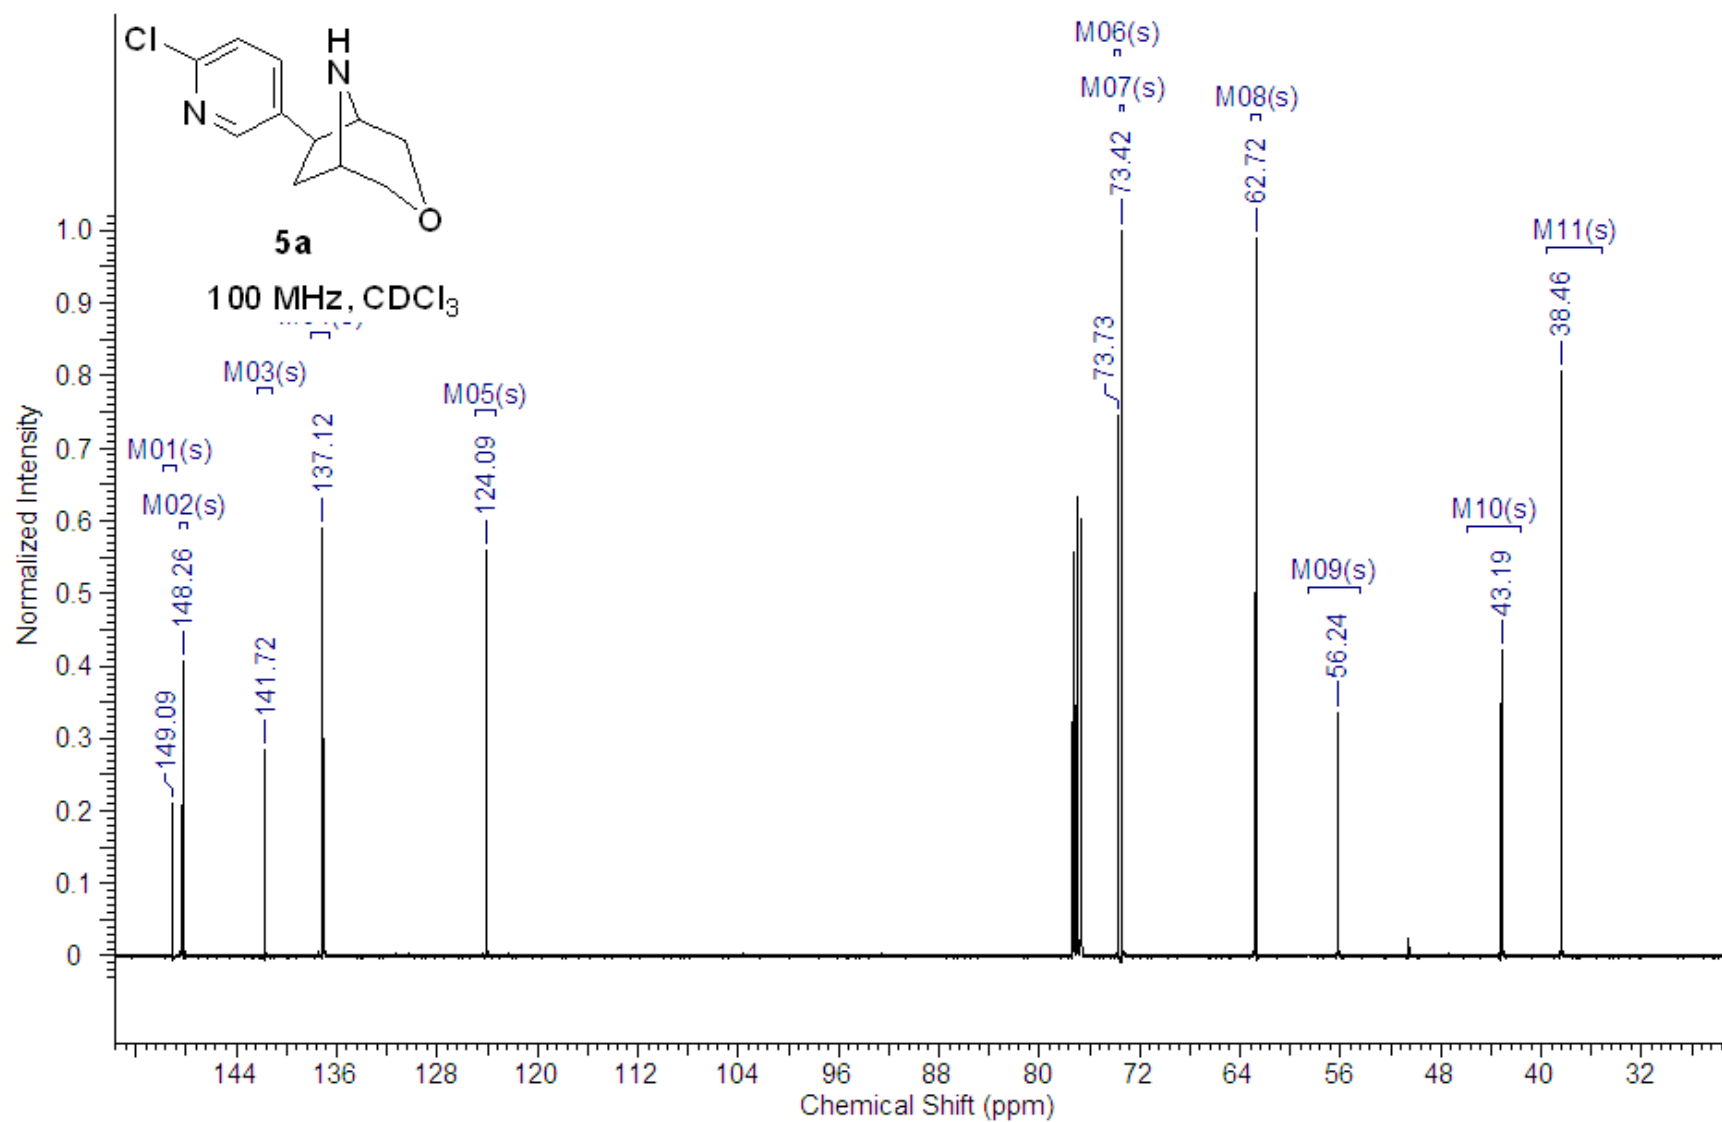

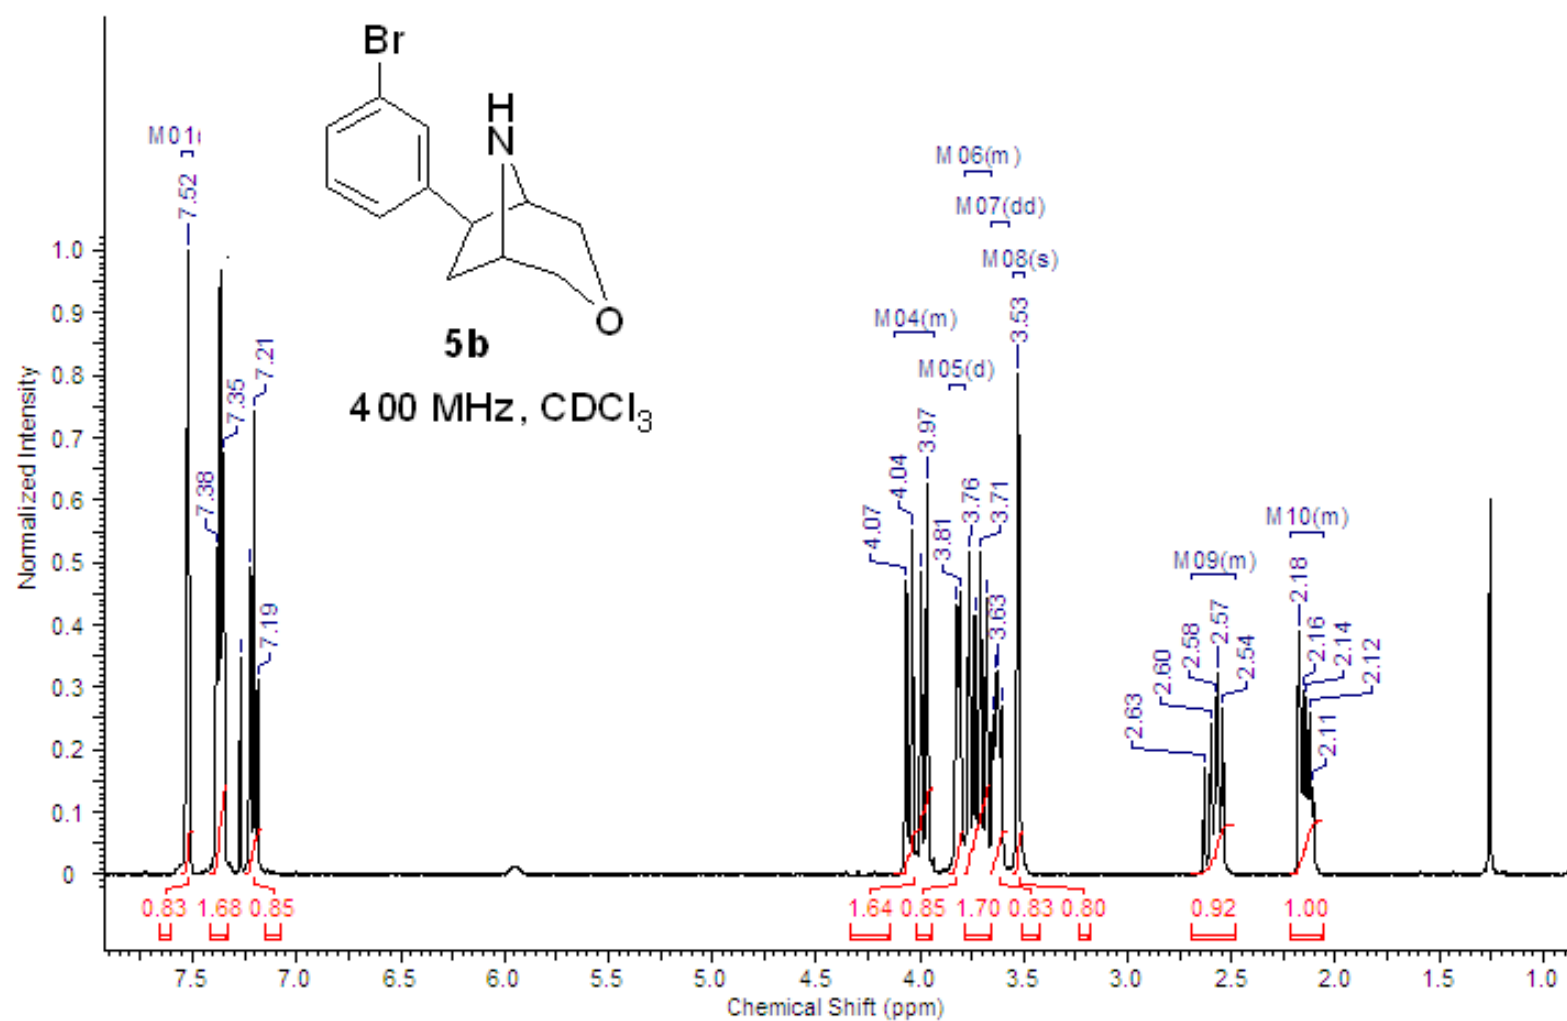

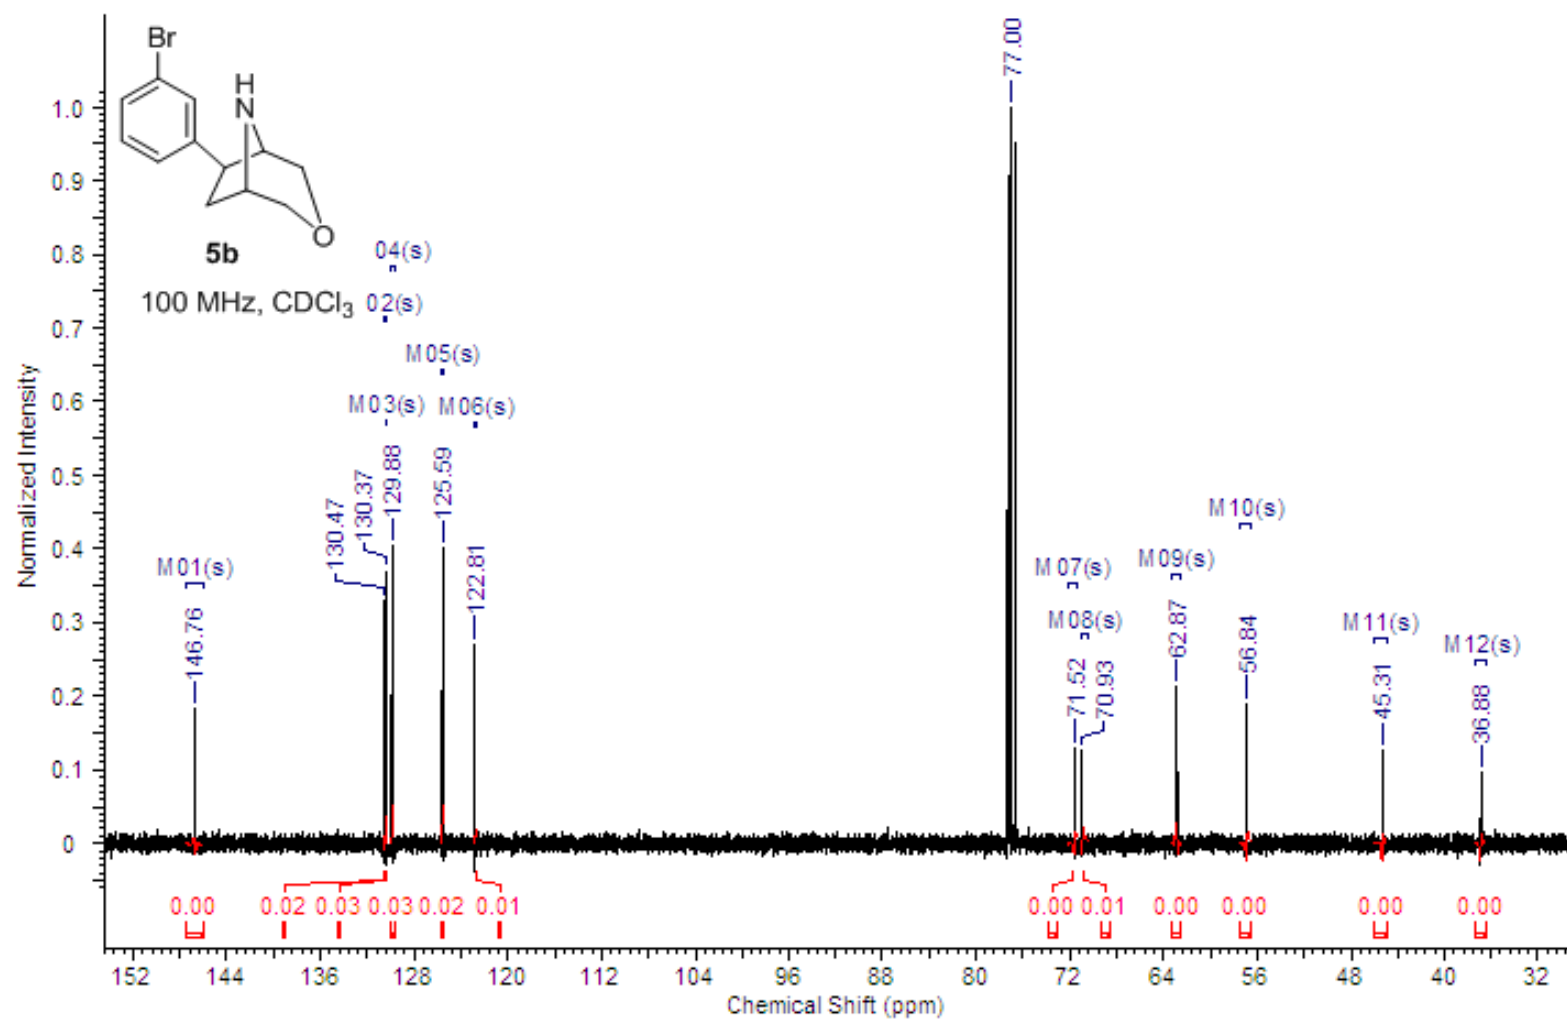

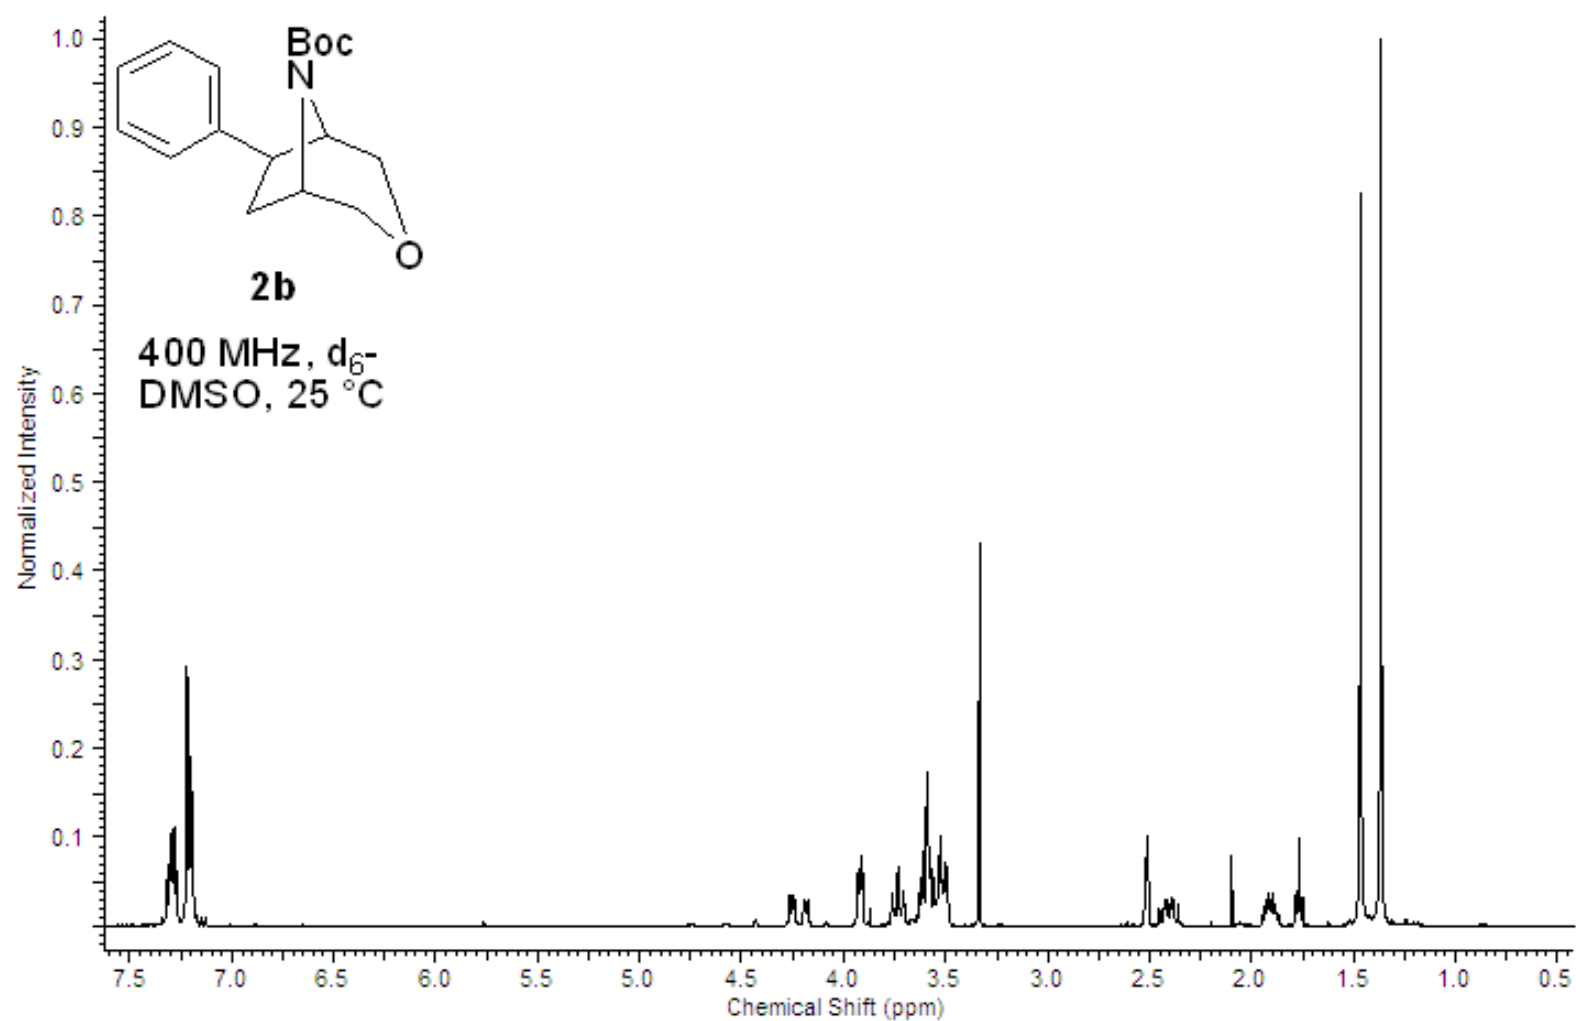

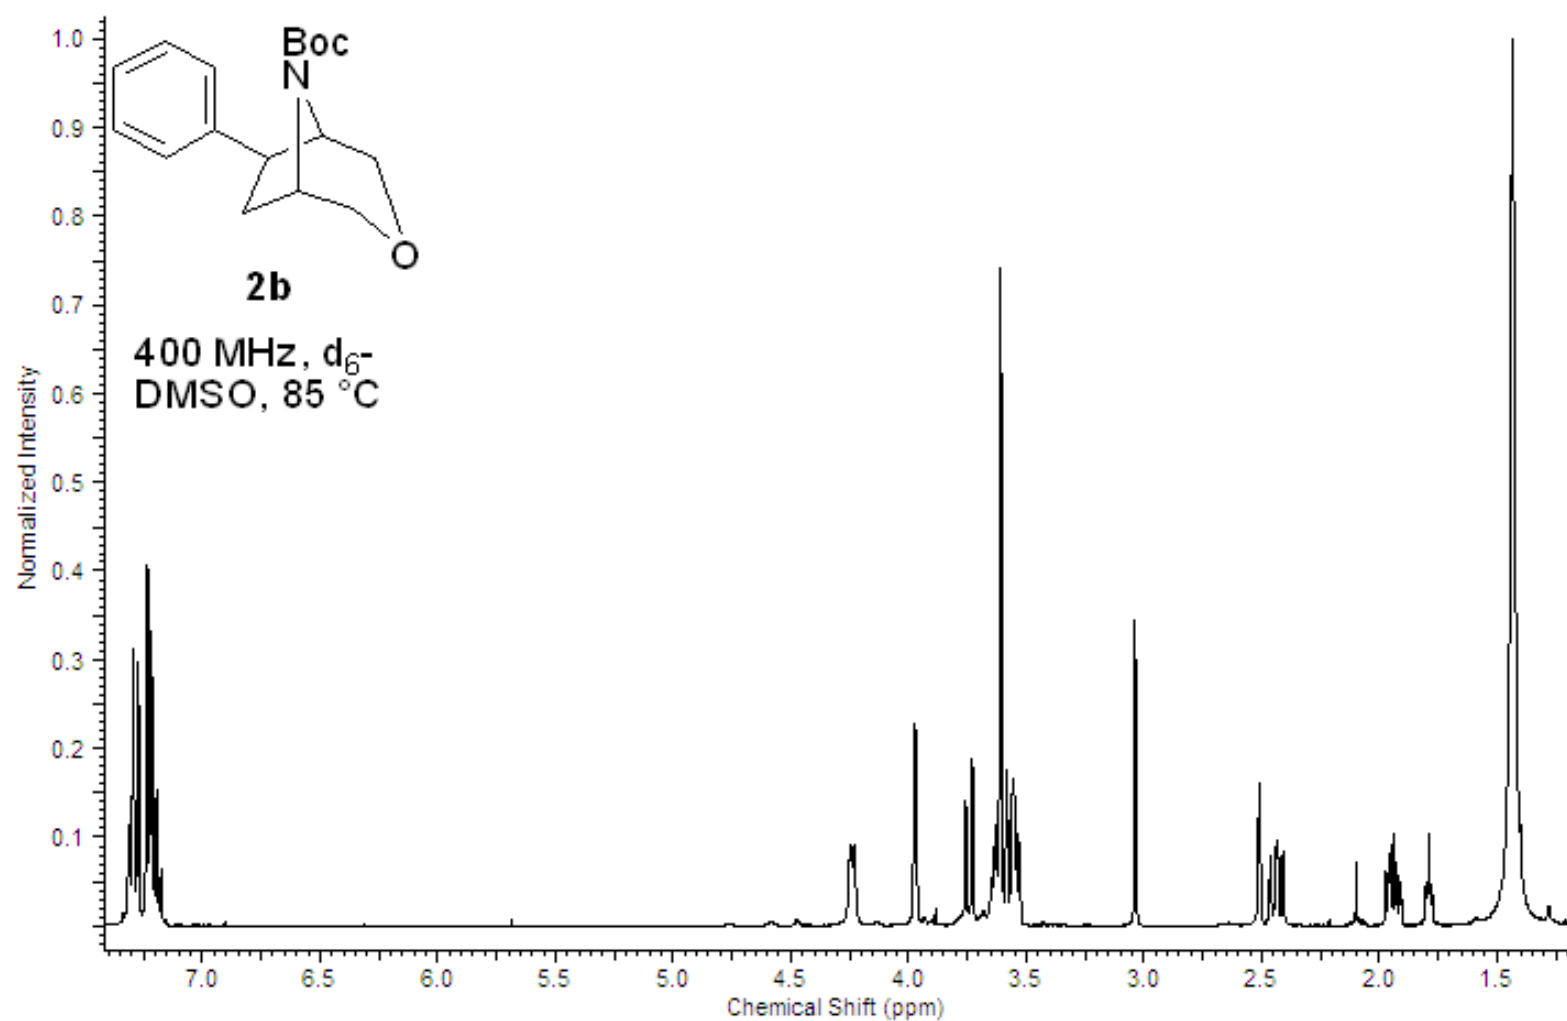

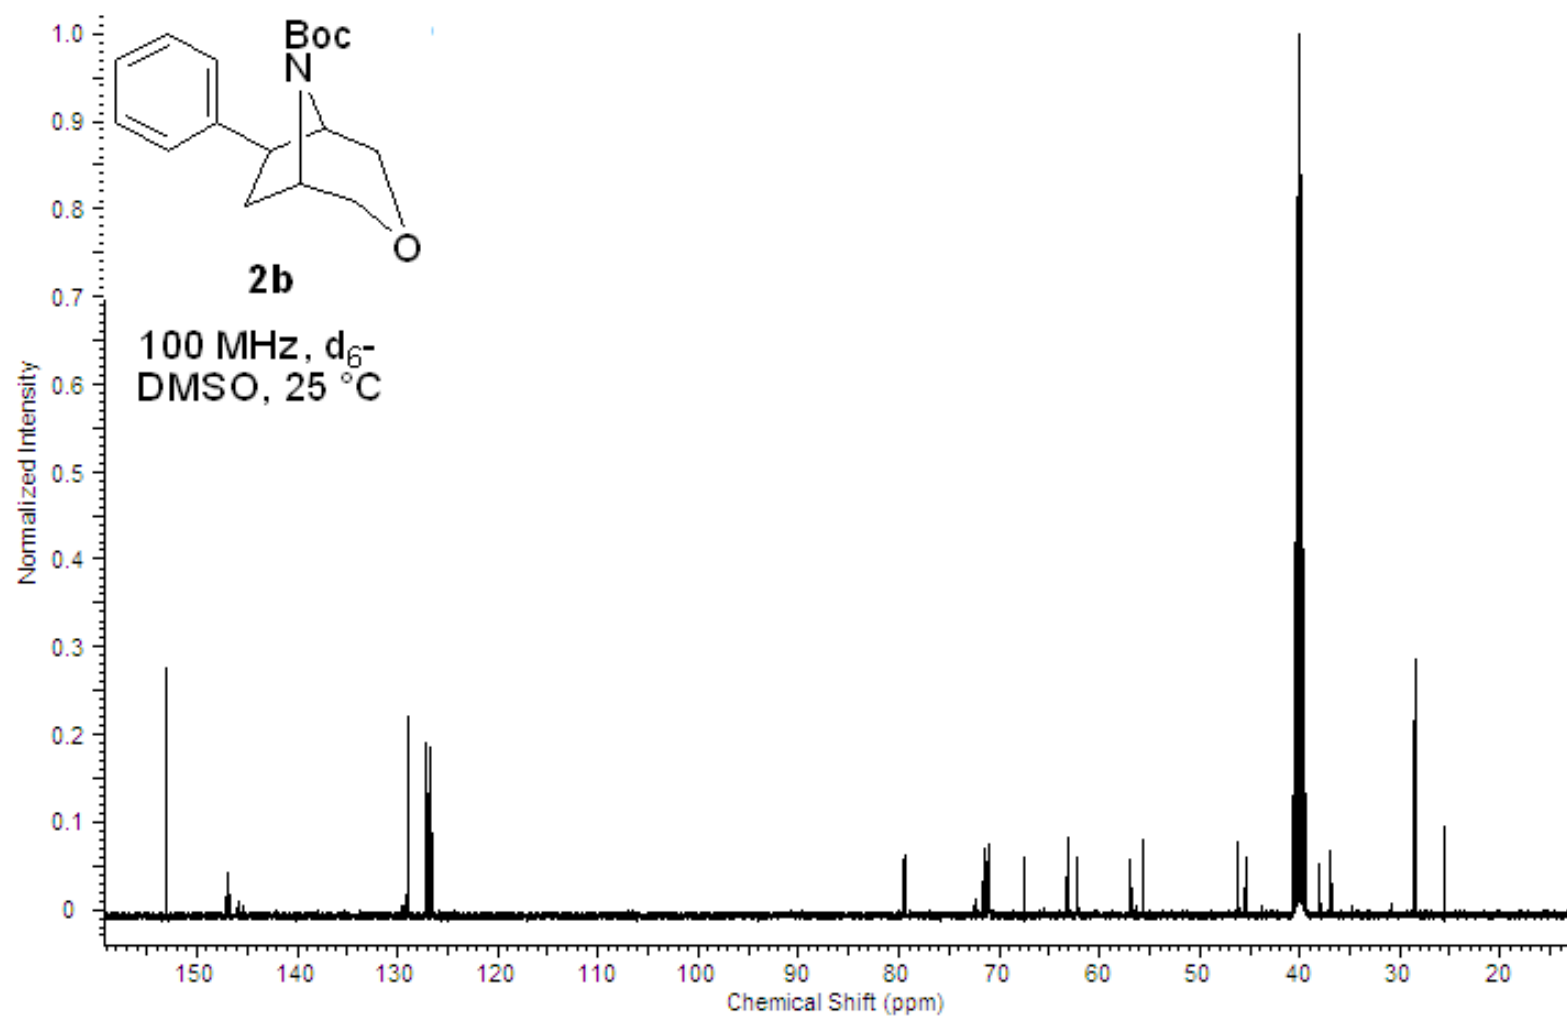

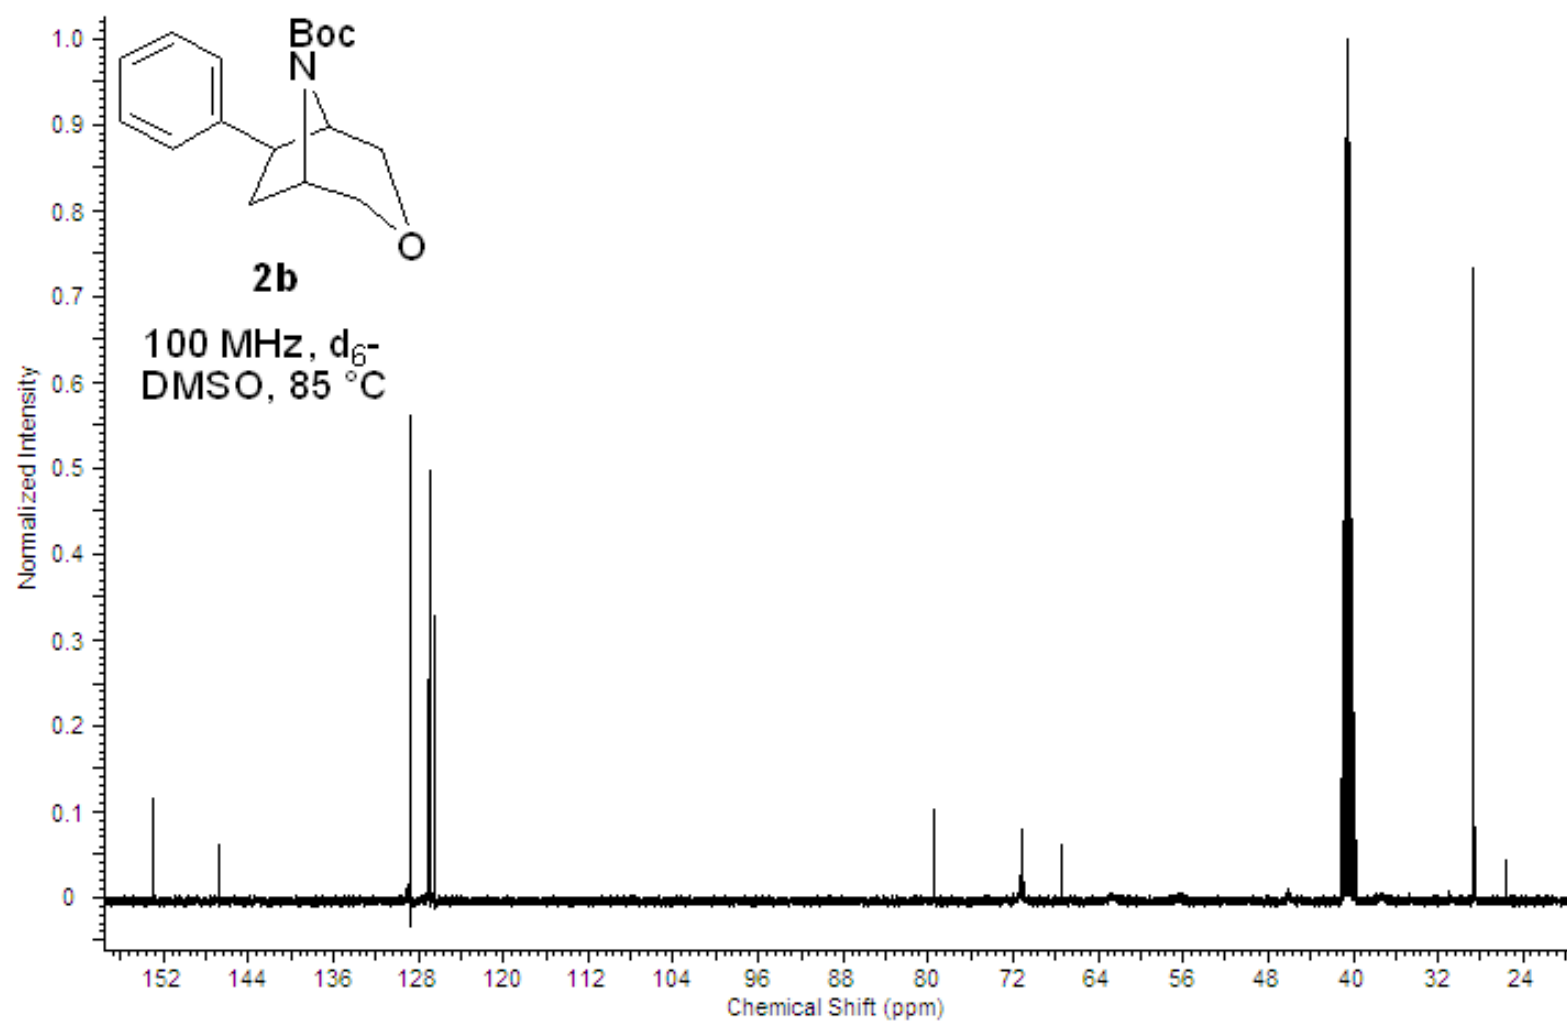

Supplement: Supplementary file 1 [file 4038517]
